1 Title:

2 **Molecular responses to freshwater limitation in the mangrove tree *Avicennia germinans***

3 **(Acanthaceae)**

4

5 Short running title:

6 **Black-Mangroves responses to water limitation**

7

8 Authors:

9 Mariana Vargas Cruz<sup>1</sup>, Gustavo Maruyama Mori<sup>2</sup>, Dong-Ha Oh<sup>3</sup>, Maheshi Dassanayake<sup>3</sup>,

10 Maria Imaculada Zucchi<sup>4</sup>, Rafael Silva Oliveira<sup>1</sup>, Anete Pereira de Souza<sup>1</sup>.

11

12 <sup>1</sup>Department of Plant Biology, Institute of Biology, University of Campinas (Unicamp),

13 Campinas, SP 13083-863, Brazil.

14 <sup>2</sup>Institute of Biosciences, São Paulo State University (Unesp), São Vicente, SP 11330-900,

15 Brazil.

16 <sup>3</sup>Department of Biological Sciences, Louisiana State University (LSU), Louisiana, LA 70803,

17 United States.

18 <sup>4</sup>São Paulo Agency for Agribusiness Technology (APTA), Piracicaba, SP 13400-790, Brazil.

19 \*Author for correspondence. Tel: +55 19 3521 1132 Email: [anete@unicamp.br](mailto:anete@unicamp.br)

20

21

22

23

24

25 **Abstract**

26 Environmental variation along the geographical space can shape populations by natural  
27 selection. In the context of global warming, accompanied by substantial changes in  
28 precipitation regimes, it is crucial to understand the role of environmental heterogeneity in  
29 tropical trees adaptation, given their disproportional contribution to water and carbon  
30 biogeochemical cycles. Here we investigated how heterogeneity in freshwater availability  
31 along tropical wetlands has influenced molecular variations of the Black-Mangrove  
32 (*Avicennia germinans*). Fifty-seven trees were sampled in seven sites differing markedly on  
33 precipitation regime and riverine freshwater inputs. Using 2,297 genome-wide single  
34 nucleotide polymorphic markers, we found signatures of natural selection by the genotype  
35 association with the precipitation of the warmest quarter and the annual precipitation. We also  
36 found candidate loci for selection, based on statistical deviations from neutral expectations of  
37 interpopulation differentiation. Most candidate loci present within coding sequences were  
38 functionally associated with central aspects of drought-tolerance or plant response to drought.  
39 Complementarily, our results strongly suggest the occurrence of a rapid evolution of a  
40 population in response to sudden and persistent limitation in plant access to soil water,  
41 following a road construction in 1974. Observations supporting rapid evolution included  
42 reduction in tree size and changes in the genetic profile and in transcripts expression levels  
43 associated with increased drought-tolerance, through accumulation of osmoprotectants and  
44 antioxidants, biosynthesis of plant cuticle, proteins protection against stress-induced  
45 degradation, stomatal closure, photorespiration and photosynthesis. We describe a major role  
46 of spatial heterogeneity in freshwater availability in the specialization of the typically tropical  
47 tree, *A. germinans*.

48 **Keywords:** *Avicennia germinans* (Black Mangrove), drought-tolerance, tropical tree,  
49 nextRAD, RNA-Seq, ecological genomics.

50

## 51 **1. Introduction**

52 Natural ecosystems are characterized by wide environmental heterogeneity over the  
53 geographical space. These spatial variations in several abiotic conditions can shape  
54 populations specializations, particularly in widespread species, through changes in genotypes  
55 and phenotypes frequencies (Kawecki & Ebert, 2004). Environmental gradients are, therefore,  
56 natural laboratories for the study of environmental selection (De Frenne et al., 2013). As  
57 sessile organisms, plants are incapable of escaping from unfavorable conditions and,  
58 therefore, are ideal models for investigating adaptation through phenotypic plasticity and/or  
59 adaptive genetic variation. They are often subject to a wide range of environmental factors,  
60 such as water, light, temperature and nutrients availability. Among the various environmental  
61 factors that determine adaptive phenotypic and genotypic diversity in plants, freshwater  
62 availability has a prominent role (Choat et al., 2018; Phillips et al., 2010). Accordingly,  
63 populational differentiation in drought-tolerance has been widely identified in various studies,  
64 providing valuable insights on evolutionary consequences of spatial variation in freshwater  
65 availability in plant species (Aranda et al., 2014; Donovan, Ludwig, Rosenthal, Rieseberg, &  
66 Dudley, 2009; Etterson, 2004; Heschel & Riginos, 2005; Keller et al., 2011; Ramírez-  
67 Valiente et al., 2018). Understanding the role of selection by heterogeneity in freshwater  
68 availability in plants diversification is increasingly relevant, as predictions indicate that we  
69 will face a warmer future accompanied by marked changes in rainfall and higher frequency of  
70 extreme climatic events in several regions worldwide (Dai, 2011; IPCC, 2014; Rodell et al.,  
71 2018). The combination of high atmospheric temperature with reduced rainfall and air

72 humidity represent a major threat to plants, especially tree species and forest ecosystems they  
73 form (Allen, Breshears, & McDowell, 2015; Allen et al., 2010; Asner et al., 2016; Choat et  
74 al., 2012; McDowell & Allen, 2015). These changes influence major components of resource-  
75 use in plants: it reduces the soil water potential, which limits the water and nutrients supply to  
76 leaves, and raises the air vapor pressure deficit (VPD), increasing water loss through  
77 transpiration (McRae, 1980; Novick et al., 2016). In response to these conditions, plants close  
78 their stomata (McAdam & Brodribb, 2015; Tyree & Sperry, 1989), decreasing the chance of  
79 death from hydraulic failure (Rowland et al., 2015), despite causing negative impacts on  
80 photosynthesis and productivity (Lawlor, 2002).

81         Currently, there is a great interest in understanding genotypic and phenotypic basis of  
82 trees resistance to drought, as these mechanisms are key to improve predictions of  
83 environmental consequences of extreme events and to elaborate plans to mitigate forest loss  
84 (Corlett, 2016; da Costa et al., 2010; Phillips et al., 2009). Substantial advances in the  
85 understanding of phenotypic characteristics that enhance drought-tolerance in trees have been  
86 achieved recently (Bartlett, Scoffoni, & Sack, 2012; Bennett, McDowell, Allen, & Anderson-  
87 Teixeira, 2015; Brodribb, Holbrook, Edwards, & Gutiérrez, 2003; Hacke, Sperry, Wheeler, &  
88 Castro, 2006; Phillips et al., 2010; Powell et al., 2017), however little is known about the  
89 molecular basis of water-stress tolerance, particularly in tropical species (Holliday et al.,  
90 2017), which contribute disproportionately to global carbon cycle (Corlett, 2016).

91         In this study, we investigated the role of environmental selection along a gradient of  
92 freshwater availability in shaping the molecular variation of a typically tropical and abundant  
93 tree, *Avicennia germinans* (L.) L. (Acanthaceae). The species is particularly suitable for the  
94 study of mechanisms involved in trees adaptation to drought, since it is the most widespread  
95 mangrove in the Atlantic East-Pacific biogeographic region (Ellison, Farnsworth, & Merkt,

96 1999), belonging to the most tolerant mangrove genus to limiting conditions for water  
97 acquisition, as drought, freezing and salinity (Pranchai et al., 2017; Reef & Lovelock, 2015;  
98 Stuart, Choat, Martin, Holbrook, & Ball, 2007). These trees occur naturally under highly  
99 variable soil water potential and air VPD, caused by daily and seasonal fluctuations in  
100 temperature, air humidity, freshwater inputs and soil salinity (Tomlinson, 1986). In tropical  
101 arid zones or during dry seasons, VPD and soil salinity can reach extreme levels, hindering  
102 the maintenance of water and ion homeostasis and thus limiting carbon gain and plant growth  
103 (Clough, Sim, Inlet, Bay, & Rivers, 1989; Lin & Sternberg, 1992).

104 We hypothesized that spatial heterogeneity in freshwater availability shapes adaptive  
105 variation in allele frequencies and in expression profiles of transcripts associated with the  
106 response to and tolerance of limiting freshwater in tropical trees. We sampled *A. germinans*  
107 individuals along a wide longitudinal range in an equatorial region (from 0°43'12" S to  
108 8°31'48" S of latitude), showing narrow spatial heterogeneity in temperature and solar  
109 radiation, but encompassing high variation in the intensity and duration of the dry season, in  
110 annual precipitation levels and in riverine freshwater input, which influence levels of soil  
111 salinity (Figure 1). We used the Nextera-tagmented reductively-amplified DNA (nextRAD)  
112 sequencing approach for the identification and genotyping of genome-wide single nucleotide  
113 polymorphisms (SNPs). We analyzed the organization of the genetic structure and performed  
114 statistical tests to identify candidate loci for selection. To minimize false positives in the  
115 detection of candidate loci (Lotterhos & Whitlock, 2015), we used distinct approaches: (1)  
116 based on the identification of loci deviating from neutral models of interpopulational genetic  
117 variation ( $F_{ST}$  outlier tests) and (2) based on direct genetic-environment (G-E) association  
118 tests. RNA sequencing (RNA-Seq) was used to assemble and characterize the transcriptome  
119 of the species, providing a functional basis for the annotation of candidate loci for selection.

120 Additionally, we examined the role of molecular adaptation to highly contrasting soil  
121 freshwater availability and salinity via differential gene expression analysis between samples  
122 from adjacent sites differing in tidal inundation frequency (Lara & Cohen, 2006; Pranchai et  
123 al., 2017), acclimated in pots under homogeneous, watered conditions. Our results provide  
124 converging signs of adaptive responses of *A. germinans* to the environmental heterogeneity in  
125 freshwater availability, including a case suggesting the rapid evolution of a population, with  
126 changes in phenotype and in the genetic profile, despite clear possibility of gene flow. We  
127 highlight the relevance of environmental heterogeneity in freshwater availability as a key  
128 selective pressure in tropical tree species.

129

## 130 **2. Materials and methods**

### 131 **2.1 Study area**

132 Sampling sites were located over more than 1,800 km of the north-northeast Brazilian  
133 coastline, between 0.724° S and 8.526° S of latitude, along a spatial gradient in freshwater  
134 availability (Table 1, Figure 1). We classified this area into three distinguishable regions,  
135 based on rainfall regimes and riverine freshwater inputs: (1) the Amazon Macrotidal  
136 Mangrove Coast (AMMC), the world's largest continuous mangrove belt (Nascimento Jr.,  
137 Souza-Filho, Proisy, Lucas, & Rosenqvist, 2013), which has a mean annual precipitation  
138 above 2,000 mm yr<sup>-1</sup> and is influenced by the mouth of the Amazon River; (2) mangroves of  
139 Northeast Brazil, which show limited forest development (Schaeffer-Novelli, Cintrón-Molero,  
140 Adaime, & de Camargo, 1990) and is characterized by the lack of riverine freshwater inputs  
141 and a mean annual precipitation below 2,000 mm yr<sup>-1</sup>, with pronounced and long dry seasons,  
142 and less than 30 mm of precipitation in the driest quarter; and (3) a region influenced by the  
143 southward-flowing branch of the South Equatorial coastal current (SEC), characterized by

144 reduced riverine freshwater inputs, mean annual precipitation below 2,000 mm yr<sup>-1</sup>, but less  
145 pronounced dry season, showing more than 100 mm of precipitation in the driest quarter.

146 In the AMMC, two adjacent sites require a more detailed description, both of which  
147 are located in the peninsula of Ajuruteua, state of Pará, between the Maiaú and Caeté  
148 estuaries (Figure 2). These sites were previously covered by a preserved mangrove forest  
149 (Cohen & Lara, 2003) and were divided by the construction of a road, in 1974. The hydrology  
150 part of the forest was dramatically changed, no longer being influenced by the Caeté River.  
151 Instead, it started flooding exclusively during the highest spring tides of the Maiaú River.  
152 These changes resulted in the local forest dieback and subsequent recolonization, mainly by  
153 *A. germinans*. Soil pore water salinity accumulated to extremely high levels (100 ppt at a 50-  
154 cm depth), and the air surface temperature frequently exceeds 40 °C (Vogt et al., 2014). These  
155 environmental features contributed to the dwarfism of recolonizing individuals (Cohen &  
156 Lara, 2003; Pranchai et al., 2017), whose shrub architecture (up to 2.0 m in height) contrasts  
157 to the former tall morphology (up to 30 m in height), still observed on surrounding areas,  
158 where the hydrology remained unaltered (Menezes, Berger, & Mehlig, 2008) (Figure 2).  
159 Throughout this work, we refer to the western side of the road as ‘PA-arid’ and to the eastern  
160 side as ‘PA-humid’.

161

## 162 **2.2 DNA extraction and sequencing**

163 Leaves from 57 adult *A. germinans* trees were sampled in seven distinct sites (Table 1)  
164 and stored in bags with silica gel. DNA extraction was performed using the DNeasy Plant  
165 Mini Kit (QIAGEN) and NucleoSpin Plant II (Macherey Nagel). DNA quality and quantity  
166 were assessed using 1% agarose gel electrophoresis and QuantiFluor dsDNA System in a  
167 Quantus fluorometer (Promega). NextRAD libraries were constructed by SNPsaurus

168 (SNPsaurus, LLC) (Russello, Waterhouse, Etter, & Johnson, 2015). Genomic DNA  
169 fragmentation and short-adapter ligation were performed with Nextera reagent (Illumina,  
170 Inc.), followed by amplification, in which one of the primers matched the adapter and  
171 extended by nine arbitrary nucleotides of DNA. Thus, amplicons were fixed at the selective  
172 end, and their lengths depended on the initial fragmentation, leading to consistent genotyping  
173 of amplified loci. Subsequently, nextRAD libraries were sequenced in a HiSeq 2500  
174 (Illumina, Inc), with 100-bp single-end chemistry (Supplementary Figure S1).

175

### 176 **2.3 SNP detection and genotyping**

177 Genotyping-by-sequencing used custom scripts (SNPsaurus, LLC) to create a  
178 reference catalog of abundant reads. Read mapping to the catalog allowed two mismatches.  
179 Biallelic loci present in at least 10% of samples were selected for the following steps. Using  
180 VCFtools 0.1.12b (Danecek et al., 2011), we selected high-quality sequences (Phred score >  
181 30), allowing a maximum of 65% missing data and one SNP per sequence, requiring a  
182 minimum coverage of 8x and a minor allele frequency  $\geq 0.05$  (Supplementary Figure S1). To  
183 reduce false SNP detection rates due to paralogy or low-quality genotype calls, we used a  
184 maximum read of 56, resulting from the product of the average read depth and 1.5 standard  
185 deviation of the mean.

186

### 187 **2.4 Genetic diversity analysis and identification of candidate SNP loci associated with** 188 **water-stress tolerance**

189 For each sampling site, we estimated the genetic diversity using per-site nucleotide  
190 diversity ( $\pi$ ), calculated using VCFtools (Danecek et al., 2011), loci presenting private alleles  
191 ( $p_A$ ), observed ( $H_O$ ) and expected ( $H_E$ ) heterozygosities, using poppr 2.8.2 (Kamvar, Tabima,



192 & Grünwald, 2014), and the percentage of polymorphic loci (%Poly), using adegenet 2.1.1  
193 (Jombart & Ahmed, 2011). We also estimated the pairwise genetic differentiation among  
194 populations ( $F_{ST}$ ), the inbreeding coefficient ( $F_{IS}$ ) and its 95% confidence interval through  
195 1000 bootstrap resampling over all SNP loci using hierfstat 0.04-22 (Goudet, 2005). The  
196 genetic structure of *A. germinans* was described by a multivariate model-free method, the  
197 discriminant analysis of principal components (DAPC) (Jombart, Devillard, & Balloux,  
198 2010), and ADMIXTURE 1.3.0 (Alexander, Novembre, & Lange, 2009). For DAPC, we  
199 considered numbers of groups from 1 to 50 and the Bayesian information criteria to determine  
200 the number of groups (K) and used the optim.a.score function to avoid overfitting during  
201 discrimination steps. For ADMIXTURE analysis, we performed three separate runs for values  
202 of K varying from 1 to 15, using the block-relaxation method for point estimation. Computing  
203 was terminated when estimates increased by less than 0.0001. The lowest level of cross-  
204 validation error indicated the most likely K-value.

205 To detect signatures of natural selection, we used three distinct methods. Loci that  
206 were highly correlated with the environmental structure (false discovery rate (FDR) <0.05)  
207 were detected using the R package LEA (Frichot & François, 2015), which is based on  
208 analyses of genetic structure and ecological association (G-E association tests).  
209 Environmental data consisting of bioclimatic and oceanographic variables were retrieved  
210 from the public databases WorldClim (Hijmans, Cameron, Parra, Jones, & Jarvis, 2005) (15  
211 precipitation, radiation and air vapor pressure layers) and Marspec (Sbrocco & Barber, 2013)  
212 (four sea surface salinity and temperature layers). To minimize the interdependence of  
213 variables, we used a correlation threshold of 0.8 (Supplementary Figure S2). Because the  
214 environmental data obtained for PA-arid could not be distinguished from those obtained for

215 PA-humid with the highest-resolution WorldClim and Marspec layers, despite their clear  
216 abiotic divergence (Figure 2), we excluded PA-arid individuals in LEA analysis.

217 To overcome limitations in the acquisition of environmental data for the PA-arid site,  
218 two other methods were used to detect candidate loci for selection, which are solely based on  
219 deviations from neutral expectations of allele frequency distributions, regardless of  
220 environmental variation data across sampling sites ( $F_{ST}$  outlier tests). With Pcadapt 2.0 (Luu,  
221 Bazin, & Blum, 2016), population structure is determined by a principal component analysis.  
222 A disproportional relation to this structure ( $FDR < 0.05$ ) is indicative of selection. With  
223 Lositan (Antao, Lopes, Lopes, Beja-Pereira, & Luikart, 2008), which uses the FDIST2  
224 method (Beaumont & Nichols, 1996), we assessed the relationship between  $F_{ST}$  and  $H_E$  to  
225 describe the neutral distribution under an island migration model. Hence, we detected loci  
226 with excessively high or low  $F_{ST}$ . Because Lositan may show partially divergent results  
227 among independent simulations, we only considered candidate loci conservatively identified  
228 in three independent simulations assuming an infinite allele model of mutation, with a  
229 confidence interval of 0.99 and a  $FDR < 0.05$ , using the neutral mean  $F_{ST}$  and forcing the  
230 mean  $F_{ST}$  options.

231 Demographic histories can affect the statistical power of tests of selection (Lotterhos  
232 & Whitlock, 2015); thus, type I and type II errors are frequently associated with these  
233 approaches (Narum & Hess, 2011). We minimized the potential for false discovery by  
234 identifying consensus candidate loci for selection among the distinct methods used for two  
235 datasets: (1) the entire genotypic dataset, including PA-arid individuals, using Lositan and  
236 Pcadapt consensus candidates and (2) a subset of genotypic data with environmental  
237 information, which excluded the PA-arid samples, using Lositan, Pcadapt and LEA consensus  
238 candidates (Supplementary Figure S1).

239

## 240 **2.5 Functional annotation of candidate loci putatively under natural selection**

241 We functionally annotated candidate loci through the reciprocal nucleotide alignment  
242 between nextRAD sequences and the reference transcriptome characterized in the present  
243 study. Blast+ 2.2.31 (Camacho et al., 2009) was used with a threshold of at least 50 aligned  
244 nucleotides, a maximum of one mismatch and no gaps (Supplementary Figure S1).

245

## 246 **2.6 Plant material for transcriptome assembly and differential expression analysis**

247 On August 16<sup>th</sup>, 2013, three similarly sized seedlings of *A. germinans* with 5-9 stem  
248 nodes were collected from the PA-arid and PA-humid sites, separated by the Bragança-  
249 Ajuruteua road (Figure 2), and transplanted with the surrounding soil into 3.0-L pots. For  
250 acclimation in a homogeneous environment, pots were placed in open-air and naturally  
251 shaded conditions and were watered daily after the sunset, with 300 mL of tap water. Plants  
252 were harvested at noon, after 72 hours of acclimation, washed with water and split into roots,  
253 stems and leaves with a sterile blade to be stored in RNAlater (Ambion Inc., Austin, TX,  
254 USA) and transported to the laboratory for RNA extraction (Figure 3).

255

## 256 **2.7 RNA extraction, cDNA library preparation and RNA sequencing**

257 RNA extraction was performed according to Oliveira, Viana, Reátegui, & Vincentz  
258 (2015). To assess purity, integrity and concentration, we used 1% agarose gel electrophoresis  
259 and a NanoVue spectrophotometer (GE Healthcare Life Sciences, Buckinghamshire, UK).  
260 Subsequently, cDNA-enriched libraries were constructed using TruSeq RNA Sample  
261 Preparation kits (Illumina Inc., California, USA). Libraries qualities were assessed using an  
262 Agilent 2100 Bioanalyzer (Agilent Technologies, California, USA) and concentrations were

263 quantified using quantitative real-time PCR (qPCR), with a Sequencing Library qPCR  
264 Quantification kit (Illumina Inc.). Sequencing was performed with two 36-cycle TruSeq SBS  
265 paired-end kits (Illumina Inc.) on a Genome Analyzer IIx platform (Illumina Inc.).

266

## 267 **2.8 *Transcriptome assembly and functional annotation of transcripts***

268 Raw data were filtered by quality, using Phred >20 for 70% of the read length, and  
269 adapters were trimmed using NGS QC Toolkit 2.3 (Patel & Jain, 2012). Filtered reads were  
270 *de novo* assembled into transcripts using the CLC Genomics Workbench  
271 (<https://www.qiagenbioinformatics.com/>). The distance between paired-end reads was set to  
272 300-500 bp, the k-mer size was set to 45 bp, and the remaining default parameters were not  
273 changed.

274 Reads were mapped to the transcriptome using Bowtie1 (Langmead, Trapnell, Pop, &  
275 Salzberg, 2009), and contiguous sequences (contigs) without read-mapping support were  
276 removed from the assembly. For transcript annotation, we used blast+ 2.2.31 (Camacho et al.,  
277 2009), with an e-value <1e-10, using reference sequences from manually curated databases,  
278 as the National Center for Biotechnology Information (NCBI) RefSeq protein and RefSeq  
279 RNA (O'Leary et al., 2016) and representative proteins and cDNA from The Arabidopsis  
280 Information Resource (TAIR) (Berardini et al., 2015). We removed putative contaminant  
281 contigs from the assembly, which did not match plant sequences but showed high similarity to  
282 nonplant sequences from the NCBI's RefSeq database. Sequences were assigned to the Kyoto  
283 Encyclopedia of Genes and Genomes (KEGG) orthology (KO) identifiers using the KEGG  
284 Automatic Annotation Server (KAAS) (Moriya, Itoh, Okuda, Yoshizawa, & Kanehisa, 2007).  
285 Protein family domains were searched using the Pfam database and the HMMER3 alignment  
286 tool (Finn et al., 2014).

287 We identified putative open reading frames (ORFs) using the program TransDecoder  
288 (<http://transdecoder.sf.net>) with default parameters. Redundant transcripts were detected using  
289 Cd-hit-est 4.6.1 (W. Li & Godzik, 2006) in the local alignment mode, with 95% identity and  
290 70% coverage of the shortest sequence thresholds. To minimize redundancy, in the final  
291 assembly, we retained only sequences with the longest putative ORF and the longest putative  
292 non-coding transcripts from each Cd-hit-est clusters. Functional categories were assigned to  
293 putative coding sequences using the *Arabidopsis thaliana* association file from the Gene  
294 Ontology Consortium website (Blake et al., 2015) (Supplementary Figure S1).

295

## 296 **2.9 Analysis of differentially expressed transcripts (DET)**

297 Counts of reads mapped to assembled transcripts per sequenced sample were used as  
298 input files in DET analyses. Reads that mapped to multiple transcripts were excluded. The  
299 count matrix was normalized and used to detect transcripts with significant differential  
300 expression between PA-arid and PA-humid samples from the Bragança-Ajuruteua road  
301 (Figures 2 and 3) with the EdgeR Bioconductor package (Robinson, McCarthy, & Smyth,  
302 2010) at a FDR <0.05. Gene Ontology (GO) term enrichment analyses were performed using  
303 the goseq R Bioconductor package (Young, Wakefield, Smyth, & Oshlack, 2010), which  
304 takes the length bias into account, with the default Wallenius approximation method and a p-  
305 value cutoff set to <0.05 (Supplementary Figure S1).

306

## 307 **3. Results**

### 308 **3.1 Population genetics analyses of *A. germinans* along the equatorial coast of Brazil**

309 Population genetics statistics are shown in Table 2. The lowest levels of genetic  
310 diversity were observed in the TMD site, as estimated by the mean  $\pi$  (0.123),  $H_D$  (0.130),  $H_E$

311 (0.168) and %Poly (34.52%). The remaining sites, influenced by the northern branch of the  
312 SEC, presented considerably higher levels of diversity (mean  $\pi$  ranging from 0.208 to 0.323;  
313  $H_E$ , from 0.195-0.296;  $H_O$ , from 0.234-0.328; %Poly 58.31-84.46%), including the PA-arid  
314 site, one of the most genetically diverse across the study region. All sampling sites deviated  
315 from Hardy-Weinberg equilibrium (HWE), with an excess of heterozygosity in all sites,  
316 besides ALC, which showed a small heterozygosity deficit ( $F_{IS}=0.03$ ). HWE deviation was  
317 highest in TMD ( $F_{IS}=-0.43$ ) but relatively low in all remaining sites, ranging from -0.15  
318 (PNB) to +0.03 (ALC).

319 A substantial genetic structure was observed over the Equatorial Brazilian coast, a  
320 region subject to highly variable rainfall and riverine freshwater inputs (Figure 1). The genetic  
321 diversity, based on 2,297 genome-wide SNPs genotyped in 57 individuals, was organized into  
322 four distinct genetic clusters ( $K=4$ ) (Figure 4a, Supplementary Figure S3a-b). The greatest  
323 genetic divergences ( $F_{ST}>0.46$ ; Nei's distance $>0.255$ ) were observed between individuals  
324 from TMD and those from all other sites (Figure 4b-c, Supplementary Table S1). The TMD  
325 site also presented the highest number of private alleles ( $p_A=46$ ). Most remarkable was the  
326 divergence between individuals from PA-arid and its adjacent site, PA-humid ( $F_{ST}=0.25$ ;  
327 Nei's distance=0.181). This divergence was greater than the observed divergence of PA-arid  
328 from PRC individuals (Supplementary Table S1), located approximately 900 km distant from  
329 each other ( $F_{ST}=0.23$ ; Nei's distance=0.177), on the semi-arid coast of Brazil. The divergent  
330 gene pool of the PA-arid population was also evident when these samples were excluded from  
331 structure analyses. The most likely number of ancestral populations dropped from four to  
332 three (Figure 4c-d, Supplementary Figure S3c-d), and the overall structure remained  
333 unchanged (Figure 4d). At a finer scale, individuals from PA-humid and MRJ sites, on the  
334 Amazon Macrotidal Mangrove Coast (AMMC), seemed to be derived from the same ancestral

335 population. This population, in turn, diverged from the population that may have given rise to  
336 individuals from ALC, PNB, and PRC sites, in Northeast Brazil (Figure 4a-b).

337

### 338 **3.2 De novo assembly and annotation of the *Avicennia germinans* reference** 339 ***transcriptome***

340 We used RNA-Seq to sequence and *de novo* assemble a reference transcriptome from  
341 leaves, stems and roots of *A. germinans* seedlings, providing a functional context for this  
342 study. A total of 249,875,572 high-quality-filtered, paired-end, 72-bp reads, representing  
343 78.25% of the raw data was used in the assembly. The reference transcriptome comprised  
344 47,821 contigs, after removal of misassembled, redundant and contaminant sequences.  
345 Putative ORFs were identified in 29,854 contigs, subsequently annotated as putative protein-  
346 coding transcripts. The remaining 17,967 contigs were classified as putative non-coding  
347 transcripts. A detailed characterization of contigs can be found in Supplementary Table S2.

348 Raw reads were mapped back to the reference transcriptome, with over 82% uniquely  
349 mapped to a single transcript and only 1.31% mapped to more than one transcript  
350 (Supplementary Table S3). We found 91.74% of the plant universal orthologs from the  
351 BUSCO database (Simão, Waterhouse, Ioannidis, Kriventseva, & Zdobnov, 2015)  
352 represented in the reference transcriptome (Supplementary Table S3). We also found from  
353 20,529 to 31,348 putative orthologous sequences between the *A. germinans* transcriptome and  
354 four other publicly available transcriptomes derived from the genus *Avicennia* L.  
355 (Acanthaceae) (Supplementary Table S4).

356 As expected, most putative protein-coding transcripts of the reference transcriptome  
357 could be annotated using relevant databases (92.6%), whereas only a few putative non-coding  
358 transcripts could be annotated (33.6%) (Supplementary Figure S5). We found 2,207 putative

359 coding transcripts (7.4%) and 11,925 putative non-coding transcripts (66.4%) unique to *A.*  
360 *germinans*, which may represent lineage specific sequences.

361

### 362 **3.3 Detection of candidate loci responding to environmental selection**

363 Genome-wide signatures of selection were detected from genotypic data retrieved  
364 from samples from all seven sites of collection (Figure 4a-b). Fifty-six putative outlier loci  
365 were consistently identified by two  $F_{ST}$  outlier methods, solely based on deviations from  
366 neutral expectations of the distribution of genetic diversity. Eleven of these loci aligned to  
367 sequences in the reference transcriptome, of which eight were highly similar to proteins  
368 associated with the response or tolerance to drought in *A. thaliana* or *Sesamum indicum*  
369 (Supplementary Figure S5).

370 The exclusion of PA-arid samples was necessary for G-E association tests, due to  
371 limitations in the resolution of Marspec and WorldClim environmental layers. From the  
372 remaining subset of 48 individuals from six sampling sites, further 153 candidate loci for  
373 selection were identified by G-E correlation and two  $F_{ST}$  outlier approaches. Out of these  
374 candidate loci, 24 aligned to the reference transcriptome, of which 20 were putative protein-  
375 coding showing high similarity to gene models from *A. thaliana* or *S. indicum*  
376 (Supplementary Figure S5).

377 Among all candidate loci for selection detected along the sampling region, we found  
378 14 loci associated with plant growth and development, wood formation, cell wall metabolism,  
379 biogenesis of the photosynthetic apparatus, abiotic stress perception and response and protein  
380 protection from stress-induced aggregation (Figure 5, Table 3). A complete characterization  
381 of candidate loci within putative coding sequences is available in Supplementary Table S5.

382

### 383 **3.4 Differential transcript expression analysis**



384 Transcriptome sequencing of seedlings grown under contrasting field conditions,  
385 revealed significant expression differences in 2,454 transcripts, despite previous  
386 acclimatization under homogeneous shaded, well-watered conditions (Figure 3). Most DETs  
387 were detected in roots (2,337) and in stems (1,383), followed by leaves (361) (Supplementary  
388 Figure S6). We refer to DETs that showed higher expression levels in samples from the PA-  
389 arid site than in samples from the PA-humid site as “DET-Arid” and to DET showing a  
390 significantly higher expression in samples from the PA-humid than in samples from the PA-  
391 arid site as “DET-Humid”.

392 The functional annotation and subsequent assignment of most putative protein-coding  
393 transcripts to GO terms (76.24%) (Supplementary Figure S4) enabled the assessment of DETs  
394 that highlighted key aspects of a differential response of *A. germinans* to contrasting source  
395 environments, differing markedly in hydrological regime, soil pore water salinity and surface  
396 temperature (Lara & Cohen, 2006; Vogt et al., 2014). We focused this analysis on enriched  
397 biological processes previously identified to be involved in the tolerance, resistance or  
398 response to osmotic and drought stress in various crops, model and non-model species,  
399 including mangroves (Figure 6).

400

#### 401 3.4.1. *Photosynthesis*

402 Mangroves have aerial, photosynthesizing roots, which contribute to carbon gain and  
403 enable root respiration in anaerobic soils, using both atmospheric and photosynthetically  
404 regenerated oxygen (Kitaya et al., 2002). Transcripts associated with photosynthesis were  
405 enriched in roots from the DET-Arid set. These transcripts included putative enzymes  
406 required for chloroplast biogenesis or development, such as HEAT SHOCK PROTEIN 90-5  
407 (HSP90-5) (Oh, Yeung, Babaei-Rad, & Zhao, 2014), the THYLAKOID FORMATION 1

408 (THF1) (Q. Wang et al., 2004), RNA POLYMERASE SIGMA SUBUNIT 2 (SIGB) (Shirano  
409 et al., 2000) and TRANSLOCASE SUBUNIT SECA1 (SECA1), which is also involved in  
410 acclimation to fluctuating light (Liu et al., 2010). Additionally, transcripts supposedly  
411 encoding several subunits of the photosynthetic apparatus and light-harvesting complexes  
412 were identified in the DET-Arid set. These DETs included photosystem II (PSII) subunits  
413 PSBX, PSBO-2, PSBQ-2, PSBR, PSBP-1, PSBY, PSII REACTION CENTER W (PSBW)  
414 and CHLOROPHYLL A-B BINDING (PSBS); photosystem I (PSI) subunits PSAD-2, PSAE-  
415 2, PSAF, PSAG, PSAH-2, PSAL, PSAO, and PSI REACTION CENTER PSI-N (PSAN);  
416 ATP SYNTHASE DELTA-SUBUNIT (ATPD); all subunits from the PSII light-harvesting  
417 complex (LHCA1-5) and most subunits from PSI (LHCB1-6). The DET-Arid set of roots also  
418 included transcripts associated with the C3 carbon fixation pathway, for instance,  
419 GLYCERALDEHYDE-3-PHOSPHATE DEHYDROGENASE, subunits A and B (GAPA1,  
420 GAPB) and their activator, THIOREDOXIN F-TYPE 1 (TRXF1) (Marri et al., 2009); two  
421 CALVIN CYCLE PROTEINS (CP12-2, CP12-3), PHOSPHOENOLPYRUVATE  
422 CARBOXYLASE 4 (PPC4), PYRUVATE ORTHOPHOSPHATE DIKINASE (PPDK),  
423 RIBULOSE BISPHTHOSPHATE CARBOXYLASE SMALL CHAIN 1A (RBCS1A) and its  
424 activator, RUBISCO ACTIVASE (RCA); and two FRUCTOSE-1,6-BISPHTHOSPHATASES  
425 (CFBP1, CYFBP). Additionally, transcripts similar to chlorophyll biosynthesis enzymes were  
426 enriched in the DET-Arid set, as ISOPENTENYL DIPHOSPHATE ISOMERASE 1 (IPP1),  
427 MAGNESIUM-CHELATASE 12 (CHLI2) and the subunit CHLH (GUN5),  
428 DICARBOXYLATE DIIRON PROTEIN (CRD1), the PROTOCHLOROPHYLLIDE  
429 OXIDOREDUCTASE C (PORC) and GLUTAMYL-TRNA REDUCTASE (HEMA1).

430

431 *3.4.2. Response to light*

432           The DET-Arid set was enriched in transcripts associated with the response to light but  
433 not directly associated with photosynthesis. These included transcripts associated with light  
434 acclimation, similar to PSII dephosphorylating PROTEIN PHOSPHATASE 2C (PBCP)  
435 (Samol et al., 2012) and RNA POLYMERASE SIGMA FACTOR A (SIGA), which are  
436 essential for maintaining electron flow and photosynthetic efficiency under changing light  
437 conditions (Privat, Hakimi, Buhot, Favory, & Lerbs-Mache, 2003). The DET-Arid set also  
438 included putative light-signaling genes and photoreceptors, as the blue light photoreceptors  
439 PHOTOTROPINS 1 and 2 (PHOT1, PHOT2), CRYPTOCHROME 1 (CRY1) and the red/far-  
440 red photoreceptors PHYTOCHROME E and A (PHYE, PHYA). These photoreceptors are  
441 sensitive to light intensity and control complex light and stress responses, including  
442 photoinduced movements as well as growth and development under limiting light (Correll et  
443 al., 2003; Ohgishi, Saji, Okada, & Sakai, 2004; Pedmale et al., 2016). Complementarily, we  
444 identified transcripts similar to proteins that interact with these photoreceptors in the  
445 mediation of shade avoidance and phototropism under low light. For instance, B-BOX  
446 DOMAIN PROTEIN 24 (STO), CONSTITUTIVE PHOTOMORPHOGENIC 1 (COP1) and  
447 SPA PROTEINS (SPA2, SPA4) (Crocco et al., 2015; Holtkotte, Ponnu, Ahmad, & Hoecker,  
448 2017; Indorf, Cordero, Neuhaus, & Rodríguez-Franco, 2007; Pacín, Semmoloni, Legris,  
449 Finlayson, & Casal, 2016; Pedmale et al., 2016). Furthermore, we identified DETs similar to  
450 the low light-induced transcription factors HOMEODOMAIN PROTEIN 1 and 52 (HB1, HB52),  
451 regulatory of developmental processes (Henriksson et al., 2005); the PSEUDO-RESPONSE  
452 REGULATOR 5 (PRR5) (Takase, Mizoguchi, Kozuka, & Tsukaya, 2013), which regulates  
453 growth in the shade avoidance response; and a transcript associated with chloroplast  
454 accumulation upon low blue light, J-DOMAIN PROTEIN REQUIRED FOR  
455 CHLOROPLAST ACCUMULATION RESPONSE 1 (JAC1) (Suetsugu, Kagawa, Wada, &

456 Corporation, 2005). Remarkably, in the DET-Arid set, we detected putative proteins required  
457 during sugar starvation induced by dark, namely, THIAMIN DIPHOSPHATE-BINDING  
458 FOLD PROTEIN (THDP-binding), 2-OXOACID DEHYDROGENASES  
459 ACYLTRANSFERASE (BCE2), GLUTAMINE-DEPENDENT ASPARAGINE  
460 SYNTHASE 1 (DIN6) and TRANSKETOLASE (DIN4) (Fujiki, Ito, Itoh, Nishida, &  
461 Watanabe, 2002; Fujiki, Ito, Nishida, & Watanabe, 2000, 2001).

462

### 463 3.4.3. *Response to water deprivation and response to salt*

464 The DET-Arid sets of roots and stems were enriched in transcripts associated with the  
465 response to osmotic stress and water deprivation, including putative genes that play relevant  
466 roles in drought and salt stress resistance. For example, various transcripts associated with the  
467 positive regulation of abscisic acid (ABA)-dependent stomatal closure, such as  
468 LIPASE/LIPOXYGENASE PLAT/LH2 (PLAT1) (Hyun et al., 2014); THIAZOLE  
469 BIOSYNTHETIC ENZYME (THI1) (C.-L. Li et al., 2016); CBL-INTERACTING PROTEIN  
470 KINASE 1 (CIPK1) (D'Angelo et al., 2006); ZEAXANTHIN EPOXIDASE (ZEP) (Park et  
471 al., 2008); the CONSTITUTIVELY PHOTOMORPHOGENIC 1 (COP1) (Moazzam-Jazi,  
472 Ghasemi, Seyedi, & Niknam, 2018); FORMS APLOID AND BINUCLEATE CELLS 1B and  
473 1C (FAB1B, FAB1C) (Bak et al., 2013); and PHOSPHOLIPASE D DELTA (PLDDELTA)  
474 (Katagiri, Takahashi, & Shinozaki, 2001; Uraji et al., 2012). Additionally, in the DET-Arid  
475 set, we detected putative ion transporters, as SLAC1 HOMOLOGUE 3 (SLAH3), essential  
476 for efficient stomatal closure and opening and induced by drought stress (A. Zhang et al.,  
477 2016); SODIUM:HYDROGEN ANTIPORTER 1 (NHD1), which protects chloroplasts from  
478 deleterious Na<sup>+</sup> concentrations (Müller et al., 2014); and Na<sup>+</sup>/Ca<sup>2+</sup> EXCHANGER (NCL),  
479 involved in Ca<sup>2+</sup> homeostasis under abiotic stress (P. Wang et al., 2012). Complementarily, in

480 the DET-Arid set, we found transcripts associated with biosynthesis and accumulation of  
481 oligosaccharides and increasing tolerance of osmotic stress, as GALACTINOL SYNTHASE  
482 1 (GolS1) (A. Nishizawa, Yabuta, & Shigeoka, 2008) and RAFFINOSE SYNTHASE  
483 (DIN10) (Taji et al., 2002). Transcripts induced by drought associated with epicuticular wax  
484 biosynthesis and transport were also among the DET-Arid. For example, transcripts similar to  
485 MYB DOMAIN PROTEIN 94 (MYB94), a key activator of wax biosynthesis genes (S. B.  
486 Lee & Suh, 2015); to the fatty acid hydroxylase ECERIFERUM1 (CER1) (Bourdenx et al.,  
487 2011), activated by MYB94; WHITE-BROWN COMPLEX HOMOLOG PROTEIN 11  
488 (WBC11), required for exporting wax and cutin monomers (Panikashvili et al., 2007); and to  
489 LIPID TRANSFER PROTEIN 4 (LTP4), involved in wax or cutin deposition in cell walls  
490 (Chae et al., 2010). Additionally, in the DET-Arid set, we detected several transcripts  
491 associated with reactive oxygen species (ROS) dissipation for the control of cell damage  
492 caused by drought, high light or salt stress, including putative COPPER/ZINC SUPEROXIDE  
493 DISMUTASES 1 and 2 (CSD1, CDS2) (Attia, Arnaud, Karray, & Lachaâl, 2008),  
494 CHLOROPLASTIC DROUGHT-INDUCED STRESS PROTEIN OF 32 kDa (CDSP32)  
495 (Broin, Cuiné, Eymery, & Rey, 2002) and MAP KINASE 6 (MAPK6) (Teige et al., 2004).

496

#### 497 *3.4.4. Response to heat*

498 Transcripts similar to genes that confer tolerance to heat were enriched among the  
499 DET-Arid sets of roots and stems. We detected several putative chaperones that modulate  
500 thermotolerance, such as the heat-shock proteins (HSPs) HSP17.4 (Wehmeyer, Hernandez,  
501 Finkelstein, & Vierling, 1996), HSP17.6 (Sun, Bernard, Cotte, Montagu, & Verbruggen,  
502 2001), HSP18.2 (Lim et al., 2006), HSP70 (S. Lee et al., 2009), HSP90.1 (Cha et al., 2013)  
503 and HSP101 (Queitsch, Hong, Vierling, & Lindquist, 2000), five HSP20-LIKE

504 CHAPERONE PROTEINS (AT1G52560, AT1G53540, AT2G27140, AT2G29500,  
505 AT5G51440) (Helm, Schmeits, & Vierling, 1995; Ayako Nishizawa et al., 2006),  
506 UNIVERSAL STRESS PROTEIN (AT3G53990) (Jung et al., 2015), the chloroplast  
507 chaperone CASEIN LYTIC PROTEINASE B3 (CLPB3) (Myouga, Motohashi, Kuromori,  
508 Nagata, & Shinozaki, 2006), and co-chaperones, as ROTAMASE FKBP 1 and 2 (ROF1 and  
509 ROF2) (Meiri & Breiman, 2009; Meiri et al., 2010). Additionally, we identified transcripts  
510 associated with heat-shock response initiation and putative components of thermomemory, as  
511 HEAT SHOCK TRANSCRIPTION FACTOR A2 (AT2G26150) and HEAT-STRESS-  
512 ASSOCIATED 32 (AT4G21320), required for long-term maintenance of acquired  
513 thermotolerance (Charng et al., 2006).

514

#### 515 3.4.5. Photorespiration

516 In the DET-Arid set of roots, we detected enrichment of putative genes associated  
517 with photorespiration similar to enzymes participating in transamination, namely,  
518 PYRIMIDINE 4 (PYD4), ALANINE:GLYOXYLATE AMINOTRANSFERASE (SGAT)  
519 and ALANINE-2-OXOGLUTARATE AMINOTRANSFERASE 2 (GGT2) (Liepman &  
520 Olsen, 2001); similar to PEROXISOMAL NAD-MALATE DEHYDROGENASE 1  
521 (PMDH1), which is required for maintaining photosynthesis under photorespiratory  
522 conditions and for carbon flow during photorespiration (Cousins, Walker, Pracharoenwattana,  
523 Smith, & Badger, 2011); and D-GLYCERATE 3-KINASE (GLYK), which catalyzes the  
524 concluding reaction of photorespiration (Boldt et al., 2005).

525

## 526 4. Discussion

527 Our study suggests a major role of variation in freshwater availability driving adaptive  
528 molecular responses in the typically tropical and widespread tree. Gradual changes in  
529 freshwater inputs from both precipitation and rivers along a spatial gradient (Figure 1) seem  
530 to play an important role in the specialization of individuals of *Avicennia germinans*, via  
531 natural selection. Limited gene flow, likely caused by geographical distance and the flow  
532 direction of superficial sea currents, may have facilitated the accumulation of adaptive  
533 differences. Additionally, we described how drastic and persistent restriction in soil  
534 freshwater availability caused the evolution of phenotype, gene pool and gene expression  
535 profile of a recently founded population of *A. germinans*, without depletion in genetic  
536 diversity and despite clear possibility of gene flow with an adjacent, unchanged population.

537

538 **4.1 Gradual environmental variation in freshwater availability might partly explain the**  
539 **organization of non-neutral genetic variation in *A. germinans***

540 The genetic structure inferred by genome-wide SNP loci (Figure 4) suggested the  
541 importance of both neutral and non-neutral environmental drivers of variation. Remarkable  
542 divergence was observed between samples influenced by the northern and southern branches  
543 of the South Equatorial sea current (SEC), corroborating previous results found for various  
544 coastal trees using putatively neutral molecular markers (Francisco, Mori, Alves, Tambarussi,  
545 & Souza, 2018; Mori, Zucchi, & Souza, 2015; Takayama, Tateishi, Murata, & Kajita, 2008).  
546 The bifurcated flow of coastal currents provides a neutral explanation to the north-south  
547 divergence, due to restrictions in the dispersal of buoyant propagules, which likely facilitate  
548 the accumulation of random north-south genetic divergences (Figure 4). Our results also  
549 suggest that the lower precipitation of the warmest quarter in northern sites (AMMC and  
550 Northeast Brazil regions) (Figure 1) may play an additional, non-neutral role in shaping this

551 north-south divergence. The closely related species, *Avicennia marina*, has the ability of  
552 directly absorbing rainwater through its leaves, presenting substantial growth spurts following  
553 precipitation events (Steppe et al., 2018). This mechanism has been observed in plants from  
554 dry lands (Breshears et al., 2008), cloud forests (Eller, Lima, & Oliveira, 2013) and in  
555 conifers (Mayr et al., 2014), and might also be present in *A. germinans*. Complementarily,  
556 both aridity and salinity enhance the leaf water storage for transient growth under favorable  
557 conditions in *A. marina*, requiring the use of alternative water sources to that supplied by  
558 roots (Nguyen et al., 2017). Therefore, our results suggest that the more even distribution of  
559 rainfall throughout the year in the TMD site likely alleviates water-stress in *A. germinans*,  
560 whereas more limited rainfall in the warmest quarter of northern regions reduces opportunities  
561 for rehydration via foliar water uptake (Figure 1), potentially favoring traits, which increase  
562 drought-tolerance. It is plausible that this environmental filter contributes to the genetic  
563 divergence observed between TMD and remaining populations (Figure 4). This hypothesis is  
564 corroborated by the detection of 21 loci candidate for selection correlated to the spatial  
565 variation in the precipitation of the warmest quarter over the study area (Figure 1). Although  
566 seven out of these loci were poorly characterized, hampering inferences about their functional  
567 relevance in the environmental context, we were able to associate 11 candidate loci with  
568 biological processes influenced by drought, as photosynthesis, cell wall metabolism, cell  
569 elongation, plant growth, protein protection from stress-induced degradation and regulation of  
570 abscisic acid signaling (Figure 5, Table 3). The adaptive importance of freshwater limitation  
571 in tropical trees was also suggested in the mangrove, *A. schaueriana* (M. V. Cruz et al.,  
572 2018), and in tropical forests and savannas (Ciemer et al., 2019), for which it was similarly  
573 suggested that an environmental filtering mechanism driven by high rainfall variability  
574 favored the survival of more drought resistant taxa.



575           Although *Avicennia* propagules can remain viable for long periods and present  
576 transoceanic dispersal (Mori, Zucchi, Sampaio, & Souza, 2015), at a finer scale, we observed  
577 a genetic divergence between sites in the AMMC region (MRJ and PA-humid) and samples  
578 from Northeast Brazilian mangroves (ALC, PNB and PRC) (Figure 4). The AMMC region  
579 shows higher annual precipitation and is more strongly influenced by riverine freshwater  
580 inputs than the remaining sites, due to its closer proximity to the Amazon River Delta (Figure  
581 1). Conversely, reduced rainfall and the lack of riverine freshwater inputs in Northeast Brazil  
582 could limit plants access to soil freshwater, due to increased soil salinity, potentially  
583 contributing to the local specialization of individuals. Even though we do not have soil  
584 salinity data to perform direct G-E association tests for selection, we were able to detect two  
585 loci correlated with the variation in total annual precipitation: one associated with a poorly  
586 characterized protein kinase and the other, with an RNA hydrolase, also correlated with  
587 heterogeneity in mean sea surface salinity (Supplementary Table S5). Given the unclear  
588 functional relevance of these putative adaptive loci in the environmental context, we  
589 recommend future efforts to analyze the role of other neutral and non-neutral variables, as soil  
590 salinity or the demographic history of *A. germinans*, to find additional explanations for the  
591 genetic divergence observed between AMMC and Northeast Brazilian mangroves (Figure 4).  
592 Candidate loci detected in our study play a significant role in drought adaptations, but their  
593 molecular functions need to be further characterized in plants adapted to physiological  
594 drought. These proteins may not get highlighted in genetic screenings performed on drought-  
595 sensitive model plants, distantly related to *A. germinans*.

596

597 **4.2    *Rapid evolution of A. germinans in response to abrupt limitation in access to soil***  
598 ***freshwater***

599           The PA-arid population of *A. germinans*, was originated after 1974, when the  
600 construction of the Bragança-Ajuruteua road altered the hydrology of part of the mangrove  
601 forest in the AMMC region (Figure 2) (Cohen & Lara, 2003). This sudden environmental  
602 change caused a large dieback of the mangrove vegetation. Gradually, the impacted area was  
603 recolonized, mainly by *A. germinans*. We estimate that the approximately 40 years since this  
604 event occurred, represent from 4 to 40 reproductive cycles of *A. germinans*, based on previous  
605 studies of closely related *Avicennia* sp. (Almahasheer, Duarte, & Irigoien, 2016; M. V. Cruz  
606 et al., 2018; Polidoro et al., 2010). Recolonizing individuals of PA-arid started presenting a  
607 dwarf, shrub architecture, very distinct from the former tall, arboreal architecture, still  
608 observed in surrounding areas where the hydrology remained unchanged (Figure 2) (Pranchai  
609 et al., 2017). This observation suggests that limitation in plant access to soil water favored  
610 smaller tree sizes, one of the most integrative characteristic of drought resistance (Bennett et  
611 al., 2015; Corlett, 2016; Naidoo, 2006; Rowland et al., 2015). On the one hand, we cannot  
612 determine how much of the difference in tree size is inherited or determined by phenotypic  
613 plasticity. On the other hand, our results revealed that a substantial and rapid change in the  
614 gene pool of the PA-arid population occurred without reduction in levels of overall genetic  
615 diversity, estimated by various parameters (Figure 2, Figure 4a-b, Table 2). The presence of  
616 high levels of genome-wide genetic variation, simultaneously with strong selection on  
617 individual traits may be a signature of substantial multivariate genetic constraints (B. Walsh  
618 & Blows, 2009). Interestingly, this divergence in allele frequencies was observed despite  
619 clear possibility of gene flow, given the geographical proximity (<10.0 m) of the PA-arid site  
620 to well preserved populations. Consistent with an adaptive response to selection by limited  
621 access to soil freshwater,  $F_{ST}$  outlier tests detected eight candidate loci within transcripts  
622 associated with functions as suppression of cell elongation, wood and xylem tracheids

623 formation, photosynthetic machinery biogenesis and repair, regulation of adaptation to stress  
624 and of protection from stress-induced protein degradation (Table 3, Figure 5).

625 Besides genotypic changes, we also identified transcripts expression differences  
626 between seedlings from PA-arid and PA-humid sites (Table 1, Figure 6) after three days  
627 acclimatization in pots under shaded, well-watered conditions (Figure 3). Because differential  
628 gene expression influences trait variation (Wolf, Lindell, & Backstrom, 2010), it can be  
629 substantial between distinct locally adapted populations (Akman, Carlson, Holsinger, &  
630 Latimer, 2016; Gould, Chen, & Lowry, 2018). Increased transcripts expression, mainly in  
631 roots of PA-arid samples, were associated with biological processes previously identified to  
632 be involved in central aspects of drought-tolerance in model and non-model plants (Ding et  
633 al., 2013; Fan et al., 2018; C. Zhang et al., 2015). For instance, we found transcripts  
634 associated with ABA-mediated stomatal closure, a well-known mechanism for maintaining  
635 water status under drought, which severely compromises growth (Murata, Mori, &  
636 Munemasa, 2015). Stomatal closure reduces the CO<sub>2</sub>:O<sub>2</sub> ratio in mesophyll cells, increasing  
637 photorespiration, also an enriched process in DET-Arid. Although photorespiration decreases  
638 photosynthesis efficiency, it plays an essential role in protecting the photosynthetic machinery  
639 from damage caused by excessive photochemical energy (Kozaki & Takeba, 1996; Wingler,  
640 Lea, Quick, & Leegood, 2000). Conversely, we also observed an enrichment of genes  
641 involved in photosynthesis, shade avoidance and response to low light intensity. Being sessile  
642 under extremely arid conditions, PA-arid plants might need to rapidly adjust photosynthesis  
643 gene expression to intermittent freshwater availability (Chaves, Flexas, & Pinheiro, 2009;  
644 Urban, Aarouf, & Bidel, 2017). The increased freshwater availability and decreased solar  
645 irradiance under experimental conditions, compared to source-site (Figure 3), likely required  
646 that PA-arid individuals broadly adjust their photosynthetic machinery. Additionally, we

647 observed several putative HSPs and heat-shock factors among DET-Arid, contributing to the  
648 protection of proteins and membranes against water-stress-induced changes (Al-Whaibi,  
649 2011). Various transcripts associated with epicuticular wax and cutin synthesis, export and  
650 deposition also showed higher expression in PA-arid than in PA-humid seedlings, likely  
651 reflecting an increased protection of cells against detrimental effects of drought by the plant  
652 cuticle of PA-arid plants (Aharoni et al., 2004; Javelle, Vernoud, Rogowsky, & Ingram,  
653 2011). Complementarily, we found transcripts associated with the accumulation of raffinose  
654 among DET-Arid, functioning as osmoprotectants and antioxidants under drought and  
655 osmotic stress and maintaining cell turgor (ElSayed, Rafudeen, & Gollmack, 2014). Overall,  
656 our comparative transcriptomic analyses suggest that PA-arid plants deal better with heat,  
657 UV, salt and drought than PA-humid plants, through changes in key regulatory mechanisms,  
658 which increase abiotic stress tolerance. These strategies may have enhanced the relative  
659 capacity of PA-arid seedlings to grow under high leaf water-deficit status and infrequent  
660 freshwater inputs.

661 We acknowledge that we cannot disentangle effects from genetic and epigenetic  
662 divergences underlying the differential transcripts expression observed. Nevertheless, both  
663 genetic and epigenetic changes might contribute to the observed trait divergence. Epigenetic  
664 changes can emerge faster than adaptive genetic changes, playing an important role,  
665 especially in early adaptive process (Kenkel & Matz, 2016; Pavey, Nosil, & Rogers, 2010).  
666 Although the mechanisms are not entirely clear, our results suggest, through independent  
667 approaches, that a rapid evolution of this population occurred, with phenotypic, genetic and  
668 gene expression changes. The desertification of the PA-arid site represents a drastic and  
669 persistent environmental change, analogous to a climate change, freshwater exclusion

670 experiment for mangroves of the tropical Brazilian coastline, in which limited access to soil  
671 freshwater likely caused the rapid evolution of recolonizing *A. germinans* individuals.

672 Although it is difficult to demonstrate rapid evolution in nature, there is growing  
673 empirical evidence that when environmental selection is very intense, evolutionary processes  
674 may occur on a very fast time scale (Amorim et al., 2017; Donihue et al., 2018; Schoener,  
675 2011).

676

### 677 **4.3 Implications for conservation**

678 Wetlands of the Northeastern coast of Brazil and the ecosystem services they provide  
679 are predicted to be particularly impacted by future reductions in precipitation and freshwater  
680 availability (Osland et al., 2018). Despite these threats, the extant gene pool of northern  
681 populations of *A. germinans* seems to harbor sufficient diversity to enable species persistence  
682 through natural selection of drought-resistant plants, as observed in the PA-arid site.  
683 Recolonizing individuals in this location share alleles with individuals from distant areas, as  
684 the PRC site (Figure 4a), located over 1,200 km away, in Northeast Brazil. Therefore, our  
685 results suggest that forests from Northeastern Brazilian mangroves contributed as source of  
686 adaptive variation through sea-dispersed propagules in the recolonization of the PA-arid site,  
687 additional to the selection on seed-bank or on migrants from closer areas.

688 Our findings indicated limited gene flow between populations influenced by northern  
689 and southern branches of the SEC (Figure 4), suggesting the contribution of neutral forces,  
690 but also of environmental selection by variation in precipitation of the warmest quarter. Given  
691 the substantial north-south genetic divergence, we recommend that northern and southern  
692 populations should be treated as two independently evolving management units (Moritz,  
693 1999). In the context of an increasingly drying climate, reforestation plans for populations of

694 *A. germinans* located south of the SEC should consider the use of mixed stocks of seedlings  
695 (Moritz, 1999), to introduce genetic variation associated with increased drought-tolerance in  
696 Northeaster mangroves, while also maintaining local alleles, possibly associated with site-  
697 specific environmental characteristics.

698

#### 699 **4.4 Concluding remarks**

700 We provide novel insights into the consequences of limited access to soil freshwater to  
701 the variation in allele frequencies, gene expression and phenotypes of a dominant tropical  
702 tree. Research on the genomic basis of tree adaptation are often limited by difficulties in  
703 implementing empirical tests, given their long generation time and the scarcity of basic  
704 biological information. In tropical forests, mostly found in developing countries, the lack of  
705 resources imposes additional challenges. Advances in the understanding of the genomic basis  
706 of drought-tolerance in tropical trees can support effective protection plans and mitigating  
707 climate change. As shown in this study, such knowledge can improve predictions of the  
708 persistence of the ecosystems they form and services they provide and generate key insight  
709 for conservation and management efforts (Holliday et al., 2017; Moran, Hartig, & Bell, 2016).

710

#### 711 **Acknowledgments**

712 We acknowledge Ilmarina Menezes for assistance with fieldwork. M.V.C. and  
713 G.M.M. received fellowships from the São Paulo Research Foundation (FAPESP  
714 2013/26793-7, 2013/08086-1, 2014/22821-9). M.V.C. received a fellowship from the  
715 Coordination for the Improvement of Higher Education Personnel (CAPES  
716 99999.008084/2015-07, 88887.177158/2018-00). G.M.M. received a grant from the Brazilian

717 National Council for Scientific and Technological Development (CNPq 448286/2014-9).

718 A.P.S. received a research fellowship from CNPq (309661/2014-5).

719

## 720 **Conflicts of interest**

721 The authors have no conflict of interest to disclose.

722

## 723 **6. References**

- 724 Aharoni, A., Dixit, S., Jetter, R., Thoenes, E., Arkel, G. van, & Pereira, A. (2004). The  
725 SHINE Clade of AP2 Domain Transcription Factors Activates Wax Biosynthesis, Alters  
726 Cuticle Properties, and Confers Drought Tolerance when Overexpressed in *Arabidopsis*.  
727 *The Plant Cell Online*, 16(9), 2463–2480. doi:10.1105/tpc.104.022897
- 728 Akman, M., Carlson, J. E., Holsinger, K. E., & Latimer, A. M. (2016). Transcriptome  
729 sequencing reveals population differentiation in gene expression linked to functional  
730 traits and environmental gradients in the South African shrub *Protea repens*. *New*  
731 *Phytologist*, 210(1), 295–309. doi:10.1111/nph.13761
- 732 Al-Whaibi, M. H. (2011). Plant heat-shock proteins □: A mini review. *Journal of King Saud*  
733 *University - Science*, 23(2), 139–150. doi:10.1016/j.jksus.2010.06.022
- 734 Alexander, D. H., Novembre, J., & Lange, K. (2009). Fast model-based estimation of ancestry  
735 in unrelated individuals. *Genome Research*, 19(9), 1655–1664.  
736 doi:10.1101/gr.094052.109
- 737 Allen, C. D., Breshears, D. D., & McDowell, N. G. (2015). On underestimation of global  
738 vulnerability to tree mortality and forest die-off from hotter drought in the  
739 Anthropocene. *Ecosphere*, 6(8), 1–55. doi:10.1890/ES15-00203.1
- 740 Allen, C. D., Macalady, A. K., Chenchouni, H., Bachelet, D., McDowell, N., Vennetier, M.,  
741 ... Cobb, N. (2010). A global overview of drought and heat-induced tree mortality  
742 reveals emerging climate change risks for forests. *Forest Ecology and Management*,  
743 259(4), 660–684. doi:10.1016/j.foreco.2009.09.001
- 744 Almahasheer, H., Duarte, C. M., & Irigoien, X. (2016). Phenology and Growth dynamics of  
745 *Avicennia marina* in the Central Red Sea. *Scientific Reports*, 6, 37785.  
746 doi:10.1038/srep37785
- 747 Alvares, C. A., Stape, J. L., Sentelhas, P. C., Gonçalves, J. L. de M., & Sparovek, G. (2013).  
748 Köppen's climate classification map for Brazil. *Meteorologische Zeitschrift*, 22(6), 711–  
749 728. doi:10.1127/0941-2948/2013/0507
- 750 Amorim, M. E., Schoener, T. W., Ramalho, G. C. C. S., Lins, A. C. R., Piovia-Scott, J., &  
751 Brandão, R. A. (2017). Lizards on newly created islands independently and rapidly adapt  
752 in morphology and diet. *Proceedings of the National Academy of Sciences*, 114(33),  
753 8812–8816. doi:10.1073/pnas.1709080114
- 754 Antao, T., Lopes, A., Lopes, R. J., Beja-Pereira, A., & Luikart, G. (2008). LOSITAN: A  
755 workbench to detect molecular adaptation based on a F<sub>st</sub>-outlier method. *BMC*  
756 *Bioinformatics*, 9(1), 1–5. doi:10.1186/1471-2105-9-323
- 757 Aranda, I., Cano, F. J., Gascó, A., Cochard, H., Nardini, A., Mancha, J. A., ... Sánchez-

- 758 gómez, D. (2014). Variation in photosynthetic performance and hydraulic architecture  
759 across European beech ( *Fagus sylvatica* L. ) populations supports the case for local  
760 adaptation to water stress. *Tree Physiology*, 35(1), 34–46. doi:10.1093/treephys/tpu101
- 761 Asner, G. P., Brodrick, P. G., Anderson, C. B., Vaughn, N., Knapp, D. E., & Martin, R. E.  
762 (2016). Progressive forest canopy water loss during the 2012 – 2015 California drought.  
763 *Proceedings of the National Academy of Sciences*, 113(2), 249–255.  
764 doi:10.1073/pnas.1523397113
- 765 Attia, H., Arnaud, N., Karray, N., & Lachaâl, M. (2008). Long-term effects of mild salt stress  
766 on growth, ion accumulation and superoxide dismutase expression of *Arabidopsis* rosette  
767 leaves. *Physiologia Plantarum*, 132(3), 293–305. doi:10.1111/j.1399-3054.2007.01009.x
- 768 Bak, G., Lee, E.-J., Lee, Y., Kato, M., Segami, S., Sze, H., ... Lee, Y. (2013). Rapid  
769 Structural Changes and Acidification of Guard Cell Vacuoles during Stomatal Closure  
770 Require Phosphatidylinositol 3,5-Bisphosphate. *The Plant Cell*, 25(6), 2202–2216.  
771 doi:10.1105/tpc.113.110411
- 772 Bang, W. Y., Hata, A., Jeong, I. S., Umeda, T., Masuda, T., Chen, J., ... Bahk, J. D. (2009).  
773 AtObgC, a plant ortholog of bacterial Obg, is a chloroplast-targeting GTPase essential  
774 for early embryogenesis. *Plant Molecular Biology*, 71(4–5), 379–390.  
775 doi:10.1007/s11103-009-9529-3
- 776 Bartlett, M. K., Scoffoni, C., & Sack, L. (2012). The determinants of leaf turgor loss point  
777 and prediction of drought tolerance of species and biomes: A global meta-analysis.  
778 *Ecology Letters*, 15, 393–405. doi:10.1111/j.1461-0248.2012.01751.x
- 779 Beaumont, M. A., & Nichols, R. A. (1996). Evaluating Loci for Use in the Genetic Analysis  
780 of Population Structure. *Proceedings of the Royal Society B: Biological Sciences*,  
781 263(1377), 1619–1626. doi:10.1098/rspb.1996.0237
- 782 Bennett, A. C., McDowell, N. G., Allen, C. D., & Anderson-Teixeira, K. J. (2015). Larger  
783 trees suffer most during drought in forests worldwide. *Nature Plants*, 1, 1–5.  
784 doi:10.1038/NPLANTS.2015.139
- 785 Berardini, T. Z., Reiser, L., Li, D., Mezheritsky, Y., Muller, R., Strait, E., & Huala, E. (2015).  
786 The *Arabidopsis* Information Resource: Making and Mining the “Gold Standard”  
787 Annotated Reference Plant Genome. *Genesis*, 53, 474–485. doi:10.1002/dvg.22877
- 788 Blake, J. A., Christie, K. R., Dolan, M. E., Drabkin, H. J., Hill, D. P., Ni, L., ... Westerfeld,  
789 M. (2015). Gene ontology consortium: Going forward. *Nucleic Acids Research*, 43,  
790 D1049–D1056. doi:10.1093/nar/gku1179
- 791 Bohne, A. V., Schwenkert, S., Grimm, B., & Nickelsen, J. (2016). Roles of Tetratricopeptide  
792 Repeat Proteins in Biogenesis of the Photosynthetic Apparatus. *International Review of*  
793 *Cell and Molecular Biology*, 324, 187–227. doi:10.1016/bs.ircmb.2016.01.005
- 794 Boldt, R., Edner, C., Kolukisaoglu, Ü., Hagemann, M., Weckwerth, W., Wienkoop, S., ...  
795 Bauwe, H. (2005). Prosthesis Retention and Effective Use of Denture Adhesive in  
796 Complete Denture Therapy. *The Plant Cell*, 17(8), 2413–2420.  
797 doi:10.1105/tpc.105.033993.enzyme
- 798 Bourdenx, B., Bernard, A., Domergue, F., Pascal, S., Leger, A., Roby, D., ... Joubes, J.  
799 (2011). Overexpression of *Arabidopsis* ECERIFERUM1 Promotes Wax Very-Long-  
800 Chain Alkane Biosynthesis and Influences Plant Response to Biotic and Abiotic  
801 Stresses. *Plant Physiology*, 156(1), 29–45. doi:10.1104/pp.111.172320
- 802 Breshears, D. D., McDowell, N. G., Goddard, K. L., Dayem, K. E., Martens, S. N., Meyer, C.  
803 W., & Brown, K. M. (2008). Foliar absorption of intercepted rainfall improves woody  
804 plant water status most during drought. *Ecology*, 89(1), 41–47. doi:10.1890/07-0437.1
- 805 Brodrick, T. J., Holbrook, N. M., Edwards, E. J., & Gutiérrez, M. V. (2003). Relations



- 806 between stomatal closure, leaf turgor and xylem vulnerability in eight tropical dry forest  
807 trees. *Plant, Cell and Environment*, 26(3), 443–450. doi:10.1046/j.1365-  
808 3040.2003.00975.x
- 809 Broin, M., Cuiné, S., Eymery, F., & Rey, P. (2002). The plastidic 2-cysteine peroxiredoxin is  
810 a target for a thioredoxin involved in the protection of the photosynthetic apparatus  
811 against oxidative damage. *The Plant Cell*, 14(6), 1417–32. doi:10.1105/tpc.001644.been
- 812 Camacho, C., Coulouris, G., Avagyan, V., Ma, N., Papadopoulos, J., Bealer, K., & Madden,  
813 T. L. (2009). BLAST+: architecture and applications. *BMC Bioinformatics*, 10, 421.  
814 doi:10.1186/1471-2105-10-421
- 815 Cha, J. Y., Ahn, G., Kim, J. Y., Kang, S. Bin, Kim, M. R., Su'udi, M., ... Son, D. (2013).  
816 Structural and functional differences of cytosolic 90-kDa heat-shock proteins (Hsp90s)  
817 in *Arabidopsis thaliana*. *Plant Physiology and Biochemistry*, 70, 368–373.  
818 doi:10.1016/j.plaphy.2013.05.039
- 819 Chae, K., Gonong, B. J., Kim, S. C., Kieslich, C. A., Morikis, D., Balasubramanian, S., &  
820 Lord, E. M. (2010). A multifaceted study of stigma/style cysteine-rich adhesin (SCA)-  
821 like *Arabidopsis* lipid transfer proteins (LTPs) suggests diversified roles for these LTPs  
822 in plant growth and reproduction. *Journal of Experimental Botany*, 61(15), 4277–4290.  
823 doi:10.1093/jxb/erq228
- 824 Chang, Y. -y., Liu, H. -c., Liu, N. -y., Chi, W. -t., Wang, C. -n., Chang, S. -h., & Wang, T. -t.  
825 (2006). A Heat-Inducible Transcription Factor, HsfA2, Is Required for Extension of  
826 Acquired Thermotolerance in *Arabidopsis*. *Plant Physiology*, 143(1), 251–262.  
827 doi:10.1104/pp.106.091322
- 828 Choat, B., Brodribb, T. J., Brodersen, C. R., Duursma, R. A., López, R., & Medlyn, B. E.  
829 (2018). Triggers of tree mortality under drought. *Nature*, 558(7711), 531–539.  
830 doi:10.1038/s41586-018-0240-x
- 831 Choat, B., Jansen, S., Brodribb, T. J., Cochard, H., Delzon, S., Bhaskar, R., ... Zanne, A. E.  
832 (2012). Global convergence in the vulnerability of forests to drought. *Nature*, 491(7426),  
833 752–755. doi:10.1038/nature11688
- 834 Ciemer, C., Boers, N., Hirota, M., Kurths, J., Müller-hansen, F., Oliveira, R. S., &  
835 Winkelmann, R. (2019). Higher resilience to climatic disturbances in tropical vegetation  
836 exposed to more variable rainfall. *Nature Geoscience*, 12, 174–179. doi:10.1038/s41561-  
837 019-0312-z
- 838 Clough, B. F., Sim, R. G., Inlet, T., Bay, M., & Rivers, I. (1989). Oecologia of mangroves in  
839 response to salinity and vapour pressure deficit. *Oecologia*, (459), 38–44.
- 840 Cohen, M. C. L., & Lara, R. J. (2003). Temporal changes of mangrove vegetation boundaries  
841 in Amazonia: Application of GIS and remote sensing techniques. *Wetlands Ecology and*  
842 *Management*, 11(4), 223–231. doi:10.1023/A:1025007331075
- 843 Corlett, R. T. (2016). The Impacts of Droughts in Tropical Forests. *Trends in Plant Science*,  
844 21(7), 584–593. doi:10.1016/j.tplants.2016.02.003
- 845 Correll, M. J., Coveney, K. M., Raines, S. V., Mullen, J. L., Hangarter, R. P., & Kiss, J. Z.  
846 (2003). Phytochromes play a role in phototropism and gravitropism in *Arabidopsis* roots.  
847 *Advances in Space Research*, 31(10), 2203–2210. doi:10.1016/S0273-1177(03)00245-X
- 848 Cousins, A. B., Walker, B. J., Pracharoenwattana, I., Smith, S. M., & Badger, M. R. (2011).  
849 Peroxisomal hydroxypyruvate reductase is not essential for photorespiration in  
850 *Arabidopsis* but its absence causes an increase in the stoichiometry of photorespiratory  
851 CO<sub>2</sub> release. *Photosynthesis Research*, 108(2–3), 91–100. doi:10.1007/s11120-011-  
852 9651-3
- 853 Crocco, C. D., Locascio, A., Escudero, C. M., Alabadí, D., Blázquez, M. A., & Botto, J. F.

- 854 (2015). The transcriptional regulator BBX24 impairs della activity to promote shade  
855 avoidance in *Arabidopsis thaliana*. *Nature Communications*, 6.  
856 doi:10.1038/ncomms7202
- 857 Cruz, M. V., Mori, G. M., Müller, C. S., Cristina, C., Oh, D., Dassanayake, M., ... Silva, R.  
858 (2018). Local adaptation insights from genomics and ecophysiology of a neotropical  
859 mangrove. *Biorxiv*, 1–43. doi:10.1101/378612
- 860 Cruz, M. V., Mori, G. M., Oh, D., Dassanayake, M., Zucchi, M. I., Oliveira, R. S., & Souza,  
861 A. P. (2019). Data from: Molecular responses to freshwater limitation in the mangrove  
862 tree *Avicennia germinans* (Acanthaceae). *Dryad Digital Repository*.  
863 doi:doi:10.5061/dryad.h11t255
- 864 D'Angelo, C., Weinl, S., Batistic, O., Pandey, G. K., Cheong, Y. H., Schültke, S., ... Kudla,  
865 J. (2006). Alternative complex formation of the Ca<sup>2+</sup>-regulated protein kinase CIPK1  
866 controls abscisic acid-dependent and independent stress responses in *Arabidopsis*. *Plant*  
867 *Journal*, 48(6), 857–872. doi:10.1111/j.1365-313X.2006.02921.x
- 868 da Costa, C. L., Galbraith, D., Almeida, S., Tanaka Portela, B. T., da Costa, M., de Athaydes  
869 Silva Junior, J., ... Meir, P. (2010). Effect of seven years of experimental drought on the  
870 aboveground biomass storage of an eastern Amazonian rainforest. *New Phytologist*, 187,  
871 579–591. doi:10.1111/j.1469-8137.2010.03309.x
- 872 Dai, A. (2011). Drought under global warming: A review. *Wiley Interdisciplinary Reviews:*  
873 *Climate Change*, 2(1), 45–65. doi:10.1002/wcc.81
- 874 Danecek, P., Auton, A., Abecasis, G., Albers, C. A., Banks, E., DePristo, M. A., ... Durbin,  
875 R. (2011). The variant call format and VCFtools. *Bioinformatics*, 27(15), 2156–2158.  
876 doi:10.1093/bioinformatics/btr330
- 877 Daniel, B., Pavkov-Keller, T., Steiner, B., Dordic, A., Gutmann, A., Nidetzky, B., ...  
878 Macheroux, P. (2015). Oxidation of monolignols by members of the berberine bridge  
879 enzyme family suggests a role in plant cell wall metabolism. *Journal of Biological*  
880 *Chemistry*, 290(30), 18770–18781. doi:10.1074/jbc.M115.659631
- 881 De Frenne, P., Graae, B. J., Rodríguez-Sánchez, F., Kolb, A., Chabrierie, O., Decocq, G., ...  
882 Verheyen, K. (2013). Latitudinal gradients as natural laboratories to infer species'  
883 responses to temperature. *Journal of Ecology*, 101(3), 784–795. doi:10.1111/1365-  
884 2745.12074
- 885 Ding, Y., Liu, N., Virilouvet, L., Riethoven, J. J., Fromm, M., & Avramova, Z. (2013). Four  
886 distinct types of dehydration stress memory genes in *Arabidopsis thaliana*. *BMC Plant*  
887 *Biology*, 13(1). doi:10.1186/1471-2229-13-229
- 888 Donihue, C. M., Herrel, A., Fabre, A. C., Kamath, A., Geneva, A. J., Schoener, T. W., ...  
889 Losos, J. B. (2018). Hurricane-induced selection on the morphology of an island lizard.  
890 *Nature*, 560(7716), 88–91. doi:10.1038/s41586-018-0352-3
- 891 Donovan, L. A., Ludwig, F., Rosenthal, D. M., Rieseberg, L. H., & Dudley, S. A. (2009).  
892 Phenotypic selection on leaf ecophysiological traits in *Helianthus*. *New Phytologist*,  
893 183(3), 868–879. doi:10.1111/j.1469-8137.2009.02916.x.
- 894 Eller, C. B., Lima, A. L., & Oliveira, R. S. (2013). Foliar uptake of fog water and transport  
895 belowground alleviates drought effects in the cloud forest tree species, *Drimys*  
896 *brasiliensis* (Winteraceae). *New Phytologist*, 199(1), 151–162. doi:10.1111/nph.12248
- 897 Ellison, A. M., Farnsworth, E. J., & Merkt, R. E. (1999). Origins of mangrove ecosystems and  
898 the mangrove biodiversity anomaly. *Global Ecology and Biogeography*, 8(2), 95–115.  
899 doi:10.1046/j.1466-822X.1999.00126.x
- 900 ElSayed, A. I., Rafudeen, M. S., & Gollmack, D. (2014). Physiological aspects of raffinose  
901 family oligosaccharides in plants: Protection against abiotic stress. *Plant Biology*, 16(1),

- 902 1–8. doi:10.1111/plb.12053
- 903 Etterson, J. R. (2004). Evolutionary potential of *Chamaecrista fasciculata* in relation to  
904 climate change. I. Clinal patterns of selection along and environmental gradient in the  
905 great plains. *Evolution*, 58(7), 1446–1458. doi:10.1111/j.0014-3820.2004.tb01726.x
- 906 Fan, L., Wang, G., Hu, W., Pantha, P., Tran, K., Zhang, H., ... Qiu, Q. (2018). Plant  
907 Physiology and Biochemistry Transcriptomic view of survival during early seedling  
908 growth of the extremophyte *Haloxylon ammodendron*. *Plant Physiology and*  
909 *Biochemistry*, 132(9), 475–489. doi:10.1016/j.plaphy.2018.09.024
- 910 Finn, R. D., Bateman, A., Clements, J., Coggill, P., Eberhardt, R. Y., Eddy, S. R., ... Punta,  
911 M. (2014). Pfam: The protein families database. *Nucleic Acids Research*, 42(D1), 222–  
912 230. doi:10.1093/nar/gkt1223
- 913 Francisco, P. M., Mori, G. M., Alves, F. M., Tambarussi, E., & Souza, A. P. De. (2018).  
914 Population genetic structure, introgression, and hybridization in the genus *Rhizophora*  
915 along the Brazilian coast. *Ecology and Evolution*, 8(6), 3491–3504.  
916 doi:10.1002/ece3.3900
- 917 Frichot, E., & François, O. (2015). LEA: An R package for landscape and ecological  
918 association studies. *Methods in Ecology and Evolution*, 6(8), 925–929.  
919 doi:10.1111/2041-210X.12382
- 920 Frydman, J. (2001). Folding of newly translated proteins in vivo: the role of molecular  
921 chaperones. *Annual Review of Biochemistry*, 70(1), 603–647.
- 922 Fujiki, Y., Ito, M., Itoh, T., Nishida, I., & Watanabe, A. (2002). Activation of the promoters  
923 of *Arabidopsis* genes for the branched-chain  $\alpha$ -keto acid dehydrogenase complex  
924 in transgenic tobacco BY-2 cells under sugar starvation. *Plant and Cell Physiology*,  
925 43(3), 275–280. doi:10.1093/pcp/pcf032
- 926 Fujiki, Y., Ito, M., Nishida, I., & Watanabe, A. (2000). Multiple signaling pathways in gene  
927 expression during sugar starvation. Pharmacological analysis of *din* gene expression in  
928 suspension-cultured cells of *Arabidopsis*. *Plant Physiology*, 124(3), 1139–1148.  
929 doi:10.1104/pp.124.3.1139
- 930 Fujiki, Y., Ito, M., Nishida, I., & Watanabe, A. (2001). Leucine and its keto acid enhance the  
931 coordinated expression of genes for branched-chain amino acid catabolism in  
932 *Arabidopsis* under sugar starvation. *FEBS Letters*, 499(1–2), 161–165.  
933 doi:10.1016/S0014-5793(01)02536-4
- 934 Goudet, J. (2005). Hierfstat, a package for R to compute and test hierarchical F -statistics.  
935 *Molecular Ecology Notes*, 5(1), 184–186. doi:10.1111/j.1471-8278
- 936 Gould, B. A., Chen, Y., & Lowry, D. B. (2018). Gene Regulatory Divergence Between  
937 Locally Adapted Ecotypes in Their Native Habitats. *Molecular Ecology*, 27(21), 4174–  
938 4188. doi:10.1111/mec.14852
- 939 Hacke, U. G., Sperry, J. S., Wheeler, J. K., & Castro, L. (2006). Scaling of angiosperm xylem  
940 structure with safety and efficiency. *Tree Physiology*, 26(6), 689–701.  
941 doi:10.1093/treephys/26.6.689
- 942 Helm, K. W., Schmeits, J., & Vierling, E. (1995). An Endomembrane-Localized Small Heat-  
943 Shock Protein from *Arabidopsis thaliana*. *Plant Physiology*, 107(1 995), 287–288.  
944 doi:10.1104/pp.107.1.287
- 945 Henriksson, E., Olsson, A. S. B., Johannesson, H., Johansson, H., Hanson, J., Engstro, P., ...  
946 Soderman, E. (2005). Homeodomain leucine zipper class I genes in *Arabidopsis*.  
947 Expression patterns and phylogenetic relationships. *Plant Physiology*, 139(1), 509–518.  
948 doi:10.1104/pp.105.063461
- 949 Heschel, M. S., & Riginos, C. (2005). Mechanisms of selection for drought stress tolerance

- 950 and avoidance in *Impatiens capensis* (Balsaminaceae). *American Journal of Botany*,  
951 92(1), 37–44. doi:10.3732/ajb.92.1.37
- 952 Hijmans, R. J., Cameron, S. E., Parra, J. L., Jones, P. G., & Jarvis, A. (2005). Very high  
953 resolution interpolated climate surfaces for global land areas. *International Journal of*  
954 *Climatology*, 25(15), 1965–1978. doi:10.1002/joc.1276
- 955 Holliday, J. A., Aitken, S. N., Cooke, J. E. K., Fady, B., González-Martínez, S. C., Heuertz,  
956 M., ... Plomion, C. (2017). Advances in ecological genomics in forest trees and  
957 applications to genetic resources conservation and breeding. *Molecular Ecology*, 706–  
958 717. doi:10.1111/mec.13963
- 959 Holtkotte, X., Ponnu, J., Ahmad, M., & Hoecker, U. (2017). The blue light-induced  
960 interaction of cryptochrome 1 with COP1 requires SPA proteins during *Arabidopsis* light  
961 signaling. *PLoS Genetics*, 13(10), 1–15. doi:10.1371/journal.pgen.1007044
- 962 Hussey, S. G., Mizrahi, E., Spokevicius, A. V., Bossinger, G., Berger, D. K., & Myburg, A.  
963 A. (2011). SND2, a NAC transcription factor gene, regulates genes involved in  
964 secondary cell wall development in *Arabidopsis* fibres and increases fibre cell area in  
965 *Eucalyptus*. *BMC Plant Biology*, 11, 1–17. doi:10.1186/1471-2229-11-173
- 966 Hyun, T. K., Van Der Graaff, E., Albacete, A., Eom, S. H., Großkinsky, D. K., Böhm, H., ...  
967 Roitsch, T. (2014). The *Arabidopsis* PLAT domain protein 1 is critically involved in  
968 abiotic stress tolerance. *PLoS ONE*, 9(11). doi:10.1371/journal.pone.0112946
- 969 Indorf, M., Cordero, J., Neuhaus, G., & Rodríguez-Franco, M. (2007). Salt tolerance (STO), a  
970 stress-related protein, has a major role in light signalling. *Plant Journal*, 51(4), 563–574.  
971 doi:10.1111/j.1365-313X.2007.03162.x
- 972 IPCC. (2014). *Climate Change 2014: Synthesis Report. Contribution of Working Groups I, II*  
973 *and III to the Fifth Assessment Report of the Intergovernmental Panel on Climate*  
974 *Change*. (CoreWritingTeam, R. K. Pachauri, & L. A. Meyer, Eds.), Cambridge  
975 University Press (Cambridge). Geneva, Switzerland: IPCC.
- 976 Javelle, M., Vernoud, V., Rogowsky, P. M., & Ingram, G. C. (2011). Epidermis: The  
977 formation and functions of a fundamental plant tissue. *New Phytologist*, 189(1), 17–39.  
978 doi:10.1111/j.1469-8137.2010.03514.x
- 979 Jombart, T., & Ahmed, I. (2011). adegenet 1.3-1: new tools for the analysis of genome-wide  
980 SNP data. *Bioinformatics*, 27(21), 3070–3071. doi:10.1093/bioinformatics/btr521
- 981 Jombart, T., Devillard, S., & Balloux, F. (2010). Discriminant analysis of principal  
982 components: a new method for the analysis of genetically structured populations. *BMC*  
983 *Genetics*, 11(1), 94. doi:10.1186/1471-2156-11-94
- 984 Jung, Y. J., Melencion, S. M. B., Lee, E. S., Park, J. H., Alinapon, C. V., Oh, H. T., ... Lee, S.  
985 Y. (2015). Universal Stress Protein Exhibits a Redox-Dependent Chaperone Function in  
986 *Arabidopsis* and Enhances Plant Tolerance to Heat Shock and Oxidative Stress.  
987 *Frontiers in Plant Science*, 6, 1–11. doi:10.3389/fpls.2015.01141
- 988 Kamvar, Z. N., Tabima, J. F., & Grünwald, N. J. (2014). Poppr: an R package for genetic  
989 analysis of populations with clonal, partially clonal, and / or sexual reproduction.  
990 *PeerJ*, 2:e281. doi:10.7717/peerj.281
- 991 Katagiri, T., Takahashi, S., & Shinozaki, K. (2001). Involvement of a novel *Arabidopsis*  
992 phospholipase D, AtPLD $\delta$ , in dehydration-inducible accumulation of phosphatidic  
993 acid in stress signalling. *Plant Journal*, 26(6), 595–605. doi:10.1046/j.1365-  
994 313X.2001.01060.x
- 995 Kawecki, T. J., & Ebert, D. (2004). Conceptual issues in local adaptation. *Ecology Letters*,  
996 7(12), 1225–1241. doi:10.1111/j.1461-0248.2004.00684.x
- 997 Keller, S. R., Soolanayakanahally, R. Y., Guy, R. D., Silim, S. N., Olson, M. S., & Tiffin, P.

- 998 (2011). Climate-driven local adaptation of ecophysiology and phenology in balsam  
999 poplar, *Populus balsamifera* L. (Salicaceae). *American Journal of Botany*, 98(1), 99–108.  
1000 doi:10.3732/ajb.1000317
- 1001 Kenkel, C. D., & Matz, M. V. (2016). Gene expression plasticity as a mechanism of coral  
1002 adaptation to a variable environment. *Nature Ecology & Evolution*, 1, 059667.  
1003 doi:10.1038/s41559-016-0014 |
- 1004 Kitaya, Y., Yabuki, K., Kiyota, M., Tani, A., Hirano, T., & Aiga, I. (2002). Gas exchange and  
1005 oxygen concentration in pneumatophores and prop roots of four mangrove species.  
1006 *Trees*, 16, 155–158. doi:10.1007/s00468-002-0167-5
- 1007 Kozaki, A., & Takeba, G. (1996). Photorespiration protects C3 plants from photooxidation.  
1008 *Nature*, 384, 557–560. doi:10.1038/384557a0
- 1009 Langmead, B., Trapnell, C., Pop, M., & Salzberg, S. (2009). Ultrafast and memory-efficient  
1010 alignment of short DNA sequences to the human genome. *Genome Biol.*, 10(3), R25.  
1011 doi:10.1186/gb-2009-10-3-r25
- 1012 Lara, R. J., & Cohen, M. C. L. (2006). Sediment porewater salinity, inundation frequency and  
1013 mangrove vegetation height in Bragança, North Brazil: An ecohydrology-based  
1014 empirical model. *Wetlands Ecology and Management*, 14(4), 349–358.  
1015 doi:10.1007/s11273-005-4991-4
- 1016 Lawlor, D. W. (2002). Limitation to photosynthesis in water-stressed leaves: Stomata vs.  
1017 Metabolism and the role of ATP. *Annals of Botany*, 89(SPEC. ISS.), 871–885.  
1018 doi:10.1093/aob/mcf110
- 1019 Lee, S. B., & Suh, M. C. (2015). Cuticular wax biosynthesis is up-regulated by the MYB94  
1020 transcription factor in *Arabidopsis*. *Plant and Cell Physiology*, 56(1), 48–60.  
1021 doi:10.1093/pcp/pcu142
- 1022 Lee, S., Lee, D. W., Lee, Y., Mayer, U., Stierhof, Y.-D., Lee, S., ... Hwang, I. (2009). Heat  
1023 Shock Protein Cognate 70-4 and an E3 Ubiquitin Ligase, CHIP, Mediate Plastid-  
1024 Destined Precursor Degradation through the Ubiquitin-26S Proteasome System in  
1025 *Arabidopsis*. *The Plant Cell*, 21(12), 3984–4001. doi:10.1105/tpc.109.071548
- 1026 Li, C.-L., Wang, M., Wu, X.-M., Chen, D.-H., Lv, H.-J., Shen, J.-L., ... Zhang, W. (2016).  
1027 THI1, a Thiamine Thiazole Synthase, Interacts with Ca<sup>2+</sup>-Dependent Protein Kinase  
1028 CPK33 and Modulates the S-Type Anion Channels and Stomatal Closure in *Arabidopsis*.  
1029 *Plant Physiology*, 170(2), 1090–1104. doi:10.1104/pp.15.01649
- 1030 Li, W., & Godzik, A. (2006). Cd-hit: A fast program for clustering and comparing large sets  
1031 of protein or nucleotide sequences. *Bioinformatics*, 22(13), 1658–1659.  
1032 doi:10.1093/bioinformatics/btl158
- 1033 Liepman, A. H., & Olsen, L. J. (2001). Peroxisomal alanine: Glyoxylate aminotransferase  
1034 (AGT1) is a photorespiratory enzyme with multiple substrates in *Arabidopsis thaliana*.  
1035 *Plant Journal*, 25(5), 487–498. doi:10.1046/j.1365-313x.2001.00961.x
- 1036 Lim, C. J., Yang, K. A., Hong, J. K., Yun, J. S. C. • D.-J., Hong, J. C., Chung, W. S., ... Lim,  
1037 C. O. (2006). Gene expression profiles during heat acclimation in *Arabidopsis thaliana*  
1038 suspension-culture cells. *Journal of Plant Research*, 119, 373–383. doi:10.1007/s10265-  
1039 006-0285-z
- 1040 Lin, G., & Sternberg, L. da S. L. (1992). Comparative study of water uptake and  
1041 photosynthetic gas exchange between scrub and fringe red mangroves, *Rhizophora*  
1042 mangle L. *Oecologia*, 90(3), 399–403. doi:10.1007/BF00317697
- 1043 Liu, D., Gong, Q., Ma, Y., Li, P., Li, J., Yang, S., ... Wang, N. N. (2010). CpSecA, a  
1044 thylakoid protein translocase subunit, is essential for photosynthetic development in  
1045 *Arabidopsis*. *Journal of Experimental Botany*, 61(6), 1655–1669.

- 1046 doi:10.1093/jxb/erq033
- 1047 Lorenzo, L. de, Merchan, F., Laporte, P., Thompson, R., Clarke, J., Sousa, C., & Crespi, M.
- 1048 (2009). A Novel Plant Leucine-Rich Repeat Receptor Kinase Regulates the Response of
- 1049 *Medicago truncatula* Roots to Salt Stress. *The Plant Cell*, *21*(1), 668–680.
- 1050 doi:10.1105/tpc.108.059576
- 1051 Lotterhos, K. E., & Whitlock, M. C. (2015). The relative power of genome scans to detect
- 1052 local adaptation depends on sampling design and statistical method. *Molecular Ecology*,
- 1053 *24*(5), 1031–1046. doi:10.1111/mec.13100
- 1054 Luu, K., Bazin, E., & Blum, M. G. B. (2016). pcadapt: An R package to perform genome
- 1055 scans for selection based on principal component analysis. *Molecular Ecology*
- 1056 *Resources*, *33*, 67–77. doi:10.1111/1755-0998.12592
- 1057 Manfield, I. W., Devlin, P. F., Jen, C.-H., Westhead, D. R., & Gilmartin, P. M. (2006).
- 1058 Conservation, Convergence, and Divergence of Light-Responsive, Circadian-Regulated,
- 1059 and Tissue-Specific Expression Patterns during Evolution of the *Arabidopsis* GATA
- 1060 Gene Family. *Plant Physiology*, *143*(2), 941–958. doi:10.1104/pp.106.090761
- 1061 Marri, L., Zaffagnini, M., Collin, V., Issakidis-Bourguet, E., Lemaire, S. D., Pupillo, P., ...
- 1062 Trost, P. (2009). Prompt and easy activation by specific thioredoxins of calvin cycle
- 1063 enzymes of *Arabidopsis thaliana* associated in the GAPDH/CP12/PRK supramolecular
- 1064 complex. *Molecular Plant*, *2*(2), 259–269. doi:10.1093/mp/ssn061
- 1065 Mayr, S., Schmid, P., Laur, J., Rosner, S., Charra-vaskou, K., Dämon, B., & Hacke, U. G.
- 1066 (2014). Uptake of Water via Branches Helps Timberline Conifers Refill Embolized
- 1067 Xylem in Late Winter. *Plant Physiology*, *164*(4), 1731–1740.
- 1068 doi:10.1104/pp.114.236646
- 1069 McAdam, S. A. M., & Brodribb, T. J. (2015). The Evolution of Mechanisms Driving the
- 1070 Stomatal Response to Vapor Pressure Deficit. *Plant Physiology*, *167*(3), 833–843.
- 1071 doi:10.1104/pp.114.252940
- 1072 McDonough, M. A., Kadirvelraj, R., Harris, P., Poulsen, J. C. N., & Larsen, S. (2004).
- 1073 Rhamnogalacturonan lyase reveals a unique three-domain modular structure for
- 1074 polysaccharide lyase family 4. *FEBS Letters*, *565*(1–3), 188–194.
- 1075 doi:10.1016/j.febslet.2004.03.094
- 1076 McDowell, N. G., & Allen, C. D. (2015). Darcy’s law predicts widespread forest mortality
- 1077 under climate warming. *Nature Climate Change*, *5*(7), 669–672.
- 1078 doi:10.1038/nclimate2641
- 1079 McRae, G. J. (1980). A Simple Procedure for Calculating Atmospheric Water Vapor
- 1080 Concentration. *Journal of the Air Pollution Control Association*, *30*(4), 394–394.
- 1081 doi:10.1080/00022470.1980.10464362
- 1082 Meiri, D., & Breiman, A. (2009). *Arabidopsis* ROF1 (FKBP62) modulates thermotolerance
- 1083 by interacting with HSP90.1 and affecting the accumulation of HsfA2-regulated sHSPs.
- 1084 *Plant Journal*, *59*(3), 387–399. doi:10.1111/j.1365-313X.2009.03878.x
- 1085 Meiri, D., Tazat, K., Cohen-Peer, R., Farchi-Pisanty, O., Aviezer-Hagai, K., Avni, A., &
- 1086 Breiman, A. (2010). Involvement of *Arabidopsis* ROF2 (FKBP65) in thermotolerance.
- 1087 *Plant Molecular Biology*, *72*(1–2), 191–203. doi:10.1007/s11103-009-9561-3
- 1088 Menezes, M. P. M. de, Berger, U., & Mehlig, U. (2008). Mangrove vegetation in Amazonia: a
- 1089 review of studies from the coast of Pará and Maranhão States, north Brazil. *Acta*
- 1090 *Amazonica*, *38*(3), 403–420. doi:10.1590/S0044-59672008000300004
- 1091 Moazzam-Jazi, M., Ghasemi, S., Seyedi, S. M., & Niknam, V. (2018). COP1 plays a
- 1092 prominent role in drought stress tolerance in *Arabidopsis* and Pea. *Plant Physiology and*
- 1093 *Biochemistry*, *130*(July), 678–691. doi:10.1016/j.plaphy.2018.08.015

- 1094 Moran, E. V., Hartig, F., & Bell, D. M. (2016). Intraspecific trait variation across scales:  
1095 Implications for understanding global change responses. *Global Change Biology*, 22(1),  
1096 137–150. doi:10.1111/gcb.13000
- 1097 Mori, G. M., Zucchi, M. I., Sampaio, I., & Souza, A. P. (2015). Species distribution and  
1098 introgressive hybridization of two *Avicennia* species from the Western Hemisphere  
1099 unveiled by phylogeographic patterns. *BMC Evolutionary Biology*, 15(1), 1–15.  
1100 doi:10.1186/s12862-015-0343-z
- 1101 Mori, G. M., Zucchi, M. I., & Souza, A. P. (2015). Multiple-geographic-scale genetic  
1102 structure of two mangrove tree species: the roles of mating system, hybridization, limited  
1103 dispersal and extrinsic factors. *Plos One*, 10, e0118710.  
1104 doi:10.1371/journal.pone.0118710
- 1105 Moritz, C. (1999). Conservation units and translocations: Strategies for conserving  
1106 evolutionary processes. *Hereditas*, 130(3), 217–228. doi:10.1111/j.1601-  
1107 5223.1999.00217.x
- 1108 Moriya, Y., Itoh, M., Okuda, S., Yoshizawa, A. C., & Kanehisa, M. (2007). KAAS: An  
1109 automatic genome annotation and pathway reconstruction server. *Nucleic Acids  
1110 Research*, 35, 182–185. doi:10.1093/nar/gkm321
- 1111 Müller, M., Kunz, H. H., Schroeder, J. I., Kemp, G., Young, H. S., & Ekkehard Neuhaus, H.  
1112 (2014). Decreased capacity for sodium export out of *Arabidopsis* chloroplasts impairs  
1113 salt tolerance, photosynthesis and plant performance. *Plant Journal*, 78(4), 646–658.  
1114 doi:10.1111/tpj.12501
- 1115 Murata, Y., Mori, I. C., & Munemasa, S. (2015). Diverse Stomatal Signaling and the Signal  
1116 Integration Mechanism. *Annual Review of Plant Biology*, 66(1), 369–392.  
1117 doi:10.1146/annurev-arplant-043014-114707
- 1118 Myouga, F., Motohashi, R., Kuromori, T., Nagata, N., & Shinozaki, K. (2006). An  
1119 *Arabidopsis* chloroplast-targeted Hsp101 homologue, APG6, has an essential role in  
1120 chloroplast development as well as heat-stress response. *Plant Journal*, 48(2), 249–260.  
1121 doi:10.1111/j.1365-313X.2006.02873.x
- 1122 Naidoo, G. (2006). Factors contributing to dwarfing in the mangrove *Avicennia marina*.  
1123 *Annals of Botany*, 97, 1095–1101. doi:10.1093/aob/mcl064
- 1124 Narum, S. R., & Hess, J. E. (2011). Comparison of FST outlier tests for SNP loci under  
1125 selection. *Molecular Ecology Resources*, 11(SUPPL. 1), 184–194. doi:10.1111/j.1755-  
1126 0998.2011.02987.x
- 1127 Nascimento Jr., W. R., Souza-Filho, P. W. M., Proisy, C., Lucas, R. M., & Rosenqvist, A.  
1128 (2013). Mapping changes in the largest continuous Amazonian mangrove belt using  
1129 object-based classification of multisensor satellite imagery. *Estuarine, Coastal and Shelf  
1130 Science*, 117, 83–93. doi:10.1016/j.ecss.2012.10.005
- 1131 Nguyen, H. T., Meir, P., Sack, L., Evans, J. R., Oliveira, R. S., & Ball, M. C. (2017). Leaf  
1132 water storage increases with salinity and aridity in the mangrove *Avicennia marina*:  
1133 integration of leaf structure, osmotic adjustment and access to multiple water sources.  
1134 *Plant, Cell and Environment*, 40(8), 1576–1591. doi:10.1111/pce.12962
- 1135 Nishizawa, A., Yabuta, Y., & Shigeoka, S. (2008). Galactinol and Raffinose Constitute a  
1136 Novel Function to Protect Plants from Oxidative Damage. *Plant Physiology*, 147(3),  
1137 1251–1263. doi:10.1104/pp.108.122465
- 1138 Nishizawa, Ayako, Yabuta, Y., Yoshida, E., Maruta, T., Yoshimura, K., & Shigeoka, S.  
1139 (2006). *Arabidopsis* heat shock transcription factor A2 as a key regulator in response to  
1140 several types of environmental stress. *Plant Journal*, 48(4), 535–547.  
1141 doi:10.1111/j.1365-313X.2006.02889.x

- 1142 Novick, K. A., Ficklin, D. L., Stoy, P. C., Williams, C. A., Bohrer, G., Oishi, A. C., ...  
1143 Phillips, R. P. (2016). The increasing importance of atmospheric demand for ecosystem  
1144 water and carbon fluxes. *Nature Climate Change*, 6(11), 1023–1027.  
1145 doi:10.1038/nclimate3114
- 1146 O’Leary, N. A., Wright, M. W., Brister, J. R., Ciufu, S., Haddad, D., McVeigh, R., ... Pruitt,  
1147 K. D. (2016). Reference sequence (RefSeq) database at NCBI: Current status, taxonomic  
1148 expansion, and functional annotation. *Nucleic Acids Research*, 44, D733–D745.  
1149 doi:10.1093/nar/gkv1189
- 1150 Oh, S. E., Yeung, C., Babaei-Rad, R., & Zhao, R. (2014). Cosuppression of the chloroplast  
1151 localized molecular chaperone HSP90.5 impairs plant development and chloroplast  
1152 biogenesis in *Arabidopsis*. *BMC Research Notes*, 7(1), 1–15. doi:10.1186/1756-0500-7-  
1153 643
- 1154 Ohgishi, M., Saji, K., Okada, K., & Sakai, T. (2004). Functional analysis of each blue light  
1155 receptor, cry1, cry2, phot1, and phot2, by using combinatorial multiple mutants in  
1156 *Arabidopsis*. *Proceedings of the National Academy of Sciences*, 101(8), 2223–2228.  
1157 doi:10.1073/pnas.0305984101
- 1158 Oliveira, R. R., Viana, A. J. C., Reátegui, A. C. E., & Vincentz, M. G. A. (2015). An efficient  
1159 method for simultaneous extraction of high-quality RNA and DNA from various plant  
1160 tissues. *Genetics and Molecular Research*, 14(4), 18828–18838.  
1161 doi:10.4238/2015.December.28.32
- 1162 Osland, M. J., Gabler, C. A., Grace, J. B., Day, R. H., McCoy, M. L., Mcleod, J. L., ...  
1163 Hartley, S. B. (2018). Climate and plant controls on soil organic matter in coastal  
1164 wetlands. *Global Change Biology*, (February). doi:10.1111/gcb.14376
- 1165 Pacín, M., Semmoloni, M., Legris, M., Finlayson, S. A., & Casal, J. J. (2016). Convergence  
1166 of CONSTITUTIVE PHOTOMORPHOGENESIS 1 and PHYTOCHROME  
1167 INTERACTING FACTOR signalling during shade avoidance. *New Phytologist*, 211(3),  
1168 967–979. doi:10.1111/nph.13965
- 1169 Pagnussat, G. C., Yu, H.-J., Ngo, Q. A., Rajani, S., Mayalagu, S., Johnson, C. S., ...  
1170 Sundaresan, V. (2005). Genetic and molecular identification of genes required for female  
1171 gametophyte development and function in *Arabidopsis*. *Development*, 132(3), 603–614.  
1172 doi:10.1242/dev.01595
- 1173 Panikashvili, D., Savaldi-Goldstein, S., Mandel, T., Yifhar, T., Franke, R. B., Hofer, R., ...  
1174 Aharoni, A. (2007). The *Arabidopsis* DESPERADO/AtWBC11 transporter is required  
1175 for cutin and wax secretion. *Plant Physiology*, 145(4), 1345–1360.  
1176 doi:10.1104/pp.107.105676
- 1177 Park, H. Y., Seok, H. Y., Park, B. K., Kim, S. H., Goh, C. H., Lee, B. ha, ... Moon, Y. H.  
1178 (2008). Overexpression of *Arabidopsis* ZEP enhances tolerance to osmotic stress.  
1179 *Biochemical and Biophysical Research Communications*, 375(1), 80–85.  
1180 doi:10.1016/j.bbrc.2008.07.128
- 1181 Patel, R. K., & Jain, M. (2012). NGS QC toolkit: A toolkit for quality control of next  
1182 generation sequencing data. *PLoS ONE*, 7(2), e30619.  
1183 doi:10.1371/journal.pone.0030619
- 1184 Pavey, S. A., Nosil, P., & Rogers, S. M. (2010). The role of gene expression in ecological  
1185 speciation. *Annals of the New York Academy of Sciences*, 1206, 110–129.  
1186 doi:10.1111/j.1749-6632.2010.05765.x
- 1187 Pedmale, U. V., Huang, S. S. C., Zander, M., Cole, B. J., Hetzel, J., Ljung, K., ... Chory, J.  
1188 (2016). Cryptochromes Interact Directly with PIFs to Control Plant Growth in Limiting  
1189 Blue Light. *Cell*, 164(1–2), 233–245. doi:10.1016/j.cell.2015.12.018



- 1190 Pesquet, E., Korolev, A. V., Calder, G., & Lloyd, C. W. (2010). The microtubule-associated  
1191 protein AtMAP70-5 regulates secondary wall patterning in *Arabidopsis* wood cells.  
1192 *Current Biology*, 20(8), 744–749. doi:10.1016/j.cub.2010.02.057
- 1193 Phillips, O. L., Aragão, L. E. O. C., Lewis, S. L., Fisher, J. B., Lloyd, J., López-González, G.,  
1194 ... Vargas, P. N. (2009). Drought Sensitivity of the Amazon Rainforest. *Science*,  
1195 323(5919), 1344–1347. doi:10.1126/science.1164033
- 1196 Phillips, O. L., Heijden, G. van der, Lewis, S. L., López-González, G., Aragão, L. E. O. C.,  
1197 Lloyd, J., ... Vilanova, E. (2010). Drought–mortality relationships for tropical forests.  
1198 *New Phytologist*, 187, 631–646. doi:10.1111/j.1469-8137.2010.03359.x Key
- 1199 Pieslinger, A. M., Hoepflinger, M. C., & Tenhaken, R. (2010). Cloning of glucuronokinase  
1200 from *Arabidopsis thaliana*, the last missing enzyme of the myo-inositol oxygenase  
1201 pathway to nucleotide sugars. *Journal of Biological Chemistry*, 285(5), 2902–2910.  
1202 doi:10.1074/jbc.M109.069369
- 1203 Polidoro, B. A., Carpenter, K. E., Collins, L., Duke, N. C., Ellison, A. M., Ellison, J. C., ...  
1204 Yong, J. W. H. (2010). The loss of species: Mangrove extinction risk and geographic  
1205 areas of global concern. *PLoS ONE*, 5(4), e10095. doi:10.1371/journal.pone.0010095
- 1206 Powell, T. L., Wheeler, J. K., de Oliveira, A. A. R., da Costa, A. C. L., Saleska, S. R., Meir,  
1207 P., & Moorcroft, P. R. (2017). Differences in xylem and leaf hydraulic traits explain  
1208 differences in drought tolerance among mature Amazon rainforest trees. *Global Change  
1209 Biology*, 23(10), 4280–4293. doi:10.1111/gcb.13731
- 1210 Pranchai, A., Jenke, M., Vogt, J., Grueters, U., Yue, L., Mehlig, U., ... Berger, U. (2017).  
1211 Density-dependent shift from facilitation to competition in a dwarf *Avicennia germinans*  
1212 forest. *Wetlands Ecology and Management*, 1–12. doi:10.1007/s11273-017-9561-z
- 1213 Privat, I., Hakimi, M. A., Buhot, L., Favory, J. J., & Lerbs-Mache, S. (2003). Characterization  
1214 of *Arabidopsis* plastid sigma-like transcription factors SIG1, SIG2 and SIG3. *Plant  
1215 Molecular Biology*, 51(3), 385–399. doi:10.1023/A:1022095017355
- 1216 Queitsch, C., Hong, S.-W., Vierling, E., & Lindquist, S. (2000). Heat Shock Protein 101 Plays  
1217 a Crucial Role in Thermotolerance in *Arabidopsis*. *Plant Cell*, 12(4), 479–492.  
1218 doi:10.1105/tpc.12.4.479
- 1219 Ramírez-Valiente, J. A., Deacon, N. J., Etterson, J., Center, A., Sparks, J. P., Sparks, K. L., ...  
1220 Cavender-Bares, J. (2018). Natural selection and neutral evolutionary processes  
1221 contribute to genetic divergence in leaf traits across a precipitation gradient in the  
1222 tropical oak *Quercus oleoides*. *Molecular Ecology*, 27, 2176–2192.  
1223 doi:10.1111/mec.14566
- 1224 Reef, R., & Lovelock, C. E. (2015). Regulation of water balance in Mangroves. *Annals of  
1225 Botany*, 115(3), 385–395. doi:10.1093/aob/mcu174
- 1226 Robinson, M. D., McCarthy, D. J., & Smyth, G. K. (2010). edgeR: a Bioconductor package  
1227 for differential expression analysis of digital gene expression data. *Bioinformatics*, 26(1),  
1228 139–140. doi:10.1093/bioinformatics/btp616
- 1229 Rodell, M., Famiglietti, J. S., Wiese, D. N., Reager, J. T., Beaudoin, H. K., Landerer, F. W.,  
1230 & Lo, M. H. (2018). Emerging trends in global freshwater availability. *Nature*,  
1231 557(7707), 651–659. doi:10.1038/s41586-018-0123-1
- 1232 Rowland, L., Da Costa, A. C. L., Galbraith, D. R., Oliveira, R. S., Binks, O. J., Oliveira, A. A.  
1233 R., ... Meir, P. (2015). Death from drought in tropical forests is triggered by hydraulics  
1234 not carbon starvation. *Nature*, 528(7580), 119–122. doi:10.1038/nature15539
- 1235 Russello, M. A., Waterhouse, M. D., Etter, P. D., & Johnson, E. A. (2015). From promise to  
1236 practice: pairing non-invasive sampling with genomics in conservation. *PeerJ*, 3, e1106.  
1237 doi:10.7717/peerj.1106

- 1238 Samol, I., Shapiguzov, A., Ingelsson, B., Fucile, G., Crèvecoeur, M., Vener, A. V., ...  
1239 Goldschmidt-Clermont, M. (2012). Identification of a Photosystem II Phosphatase  
1240 Involved in Light Acclimation in *Arabidopsis*. *The Plant Cell*, 24(6), 2596–2609.  
1241 doi:10.1105/tpc.112.095703
- 1242 Sbrocco, E. J., & Barber, P. H. (2013). MARSPEC: ocean climate layers for marine spatial  
1243 ecology. *Ecology*, 94(4), 979–979. doi:10.1890/12-1358.1
- 1244 Schaeffer-Novelli, Y., Cintrón-Molero, G., Adaime, R. R., & de Camargo, T. M. (1990).  
1245 Variability of mangrove ecosystems along the Brazilian coast. *Estuaries*, 13(2), 204–  
1246 218. doi:10.1007/BF02689854
- 1247 Schoener, T. W. (2011). The Newest Synthesis: Understanding the Interplay of Evolutionary  
1248 and Ecological Dynamics. *Science*, 331(6016), 426–429. doi:10.1126/science.1193954
- 1249 Shirano, Y., Shimada, H., Kanamaru, K., Fujiwara, M., Tanaka, K., Takahashi, H., ...  
1250 Shibata, D. (2000). Chloroplast development in *Arabidopsis thaliana* requires the  
1251 nuclear-encoded transcription factor Sigma B. *FEBS Letters*, 485(2–3), 178–182.  
1252 doi:10.1016/S0014-5793(00)02216-X
- 1253 Simão, F. A., Waterhouse, R. M., Ioannidis, P., Kriventseva, E. V., & Zdobnov, E. M. (2015).  
1254 BUSCO: Assessing genome assembly and annotation completeness with single-copy  
1255 orthologs. *Bioinformatics*, 31(19), 3210–3212. doi:10.1093/bioinformatics/btv351
- 1256 Steppe, K., Vandegheuchte, M. W., Van de Wal, B. A. E., Hoste, P., Guyot, A., Lovelock, C.  
1257 E., & Lockington, D. A. (2018). Direct uptake of canopy rainwater causes turgor-driven  
1258 growth spurts in the mangrove *Avicennia marina*. *Tree Physiology*, 38(7), 979–991.  
1259 doi:10.1093/treephys/tpy024
- 1260 Stone, S. L., Williams, L. A., Farmer, L. M., Vierstra, R. D., & Callis, J. (2006). KEEP ON  
1261 GOING, a RING E3 Ligase Essential for *Arabidopsis* Growth and Development, Is  
1262 Involved in Abscisic Acid Signaling. *Plant Cell Online*, 18(12), 3415–3428.  
1263 doi:10.1105/tpc.106.046532
- 1264 Stuart, S. A., Choat, B., Martin, K. C., Holbrook, N. M., & Ball, M. C. (2007). The role of  
1265 freezing in setting the latitudinal limits of mangrove forests. *New Phytologist*, 173(3),  
1266 576–583. doi:10.1111/j.1469-8137.2006.01938.x
- 1267 Suetsugu, N., Kagawa, T., Wada, M., & Corporation, T. (2005). An Auxilin-Like J-Domain  
1268 Protein, JAC1, Regulates Phototropin-Mediated Chloroplast Movement. *Plant*  
1269 *Physiology*, 139(September), 151–162. doi:10.1104/pp.105.067371.flowering
- 1270 Sun, W., Bernard, C., Cotte, B. van de, Montagu, M. Van, & Verbruggen, N. (2001). At-  
1271 HSP17.6A, encoding a small heat-shock protein in *Arabidopsis*, can enhance  
1272 osmotolerance upon overexpression. *The Plant Journal*, 27(5), 407–415.  
1273 doi:10.1046/j.1365-313X.2001.01107.x
- 1274 Taji, T., Ohsumi, C., Iuchi, S., Seki, M., Kasuga, M., Kobayashi, M., ... Shinozaki, K.  
1275 (2002). Important roles of drought- and cold-inducible genes for galactinol synthase in  
1276 stress tolerance in *Arabidopsis thaliana*. *Plant Journal*, 29(4), 417–426.  
1277 doi:10.1046/j.0960-7412.2001.01227.x
- 1278 Takase, M., Mizoguchi, T., Kozuka, T., & Tsukaya, H. (2013). The unique function of the  
1279 *Arabidopsis* circadian clock gene PRR5 in the regulation of shade avoidance response.  
1280 *Plant Signaling and Behavior*, 8(4). doi:10.4161/psb.23534
- 1281 Takayama, K., Tateishi, Y., Murata, J., & Kajita, T. (2008). Gene flow and population  
1282 subdivision in a pantropical plant with sea-drifted seeds *Hibiscus tiliaceus* and its allied  
1283 species: Evidence from microsatellite analyses. *Molecular Ecology*, 17(11), 2730–2742.  
1284 doi:10.1111/j.1365-294X.2008.03799.x
- 1285 Teige, M., Scheickl, E., Eulgem, T., Dóczy, R., Ichimura, K., Shinozaki, K., ... Hirt, H. (2004).

- 1286 The MKK2 pathway mediates cold and salt stress signaling in *Arabidopsis*. *Molecular*  
1287 *Cell*, 15(1), 141–152. doi:10.1016/j.molcel.2004.06.023
- 1288 ten Hove, C. A., Bochdanovits, Z., Jansweijer, V. M. A., Koning, F. G., Berke, L., Sanchez-  
1289 Perez, G. F., ... Heidstra, R. (2011). Probing the roles of LRR RLK genes in *Arabidopsis*  
1290 *thaliana* roots using a custom T-DNA insertion set. *Plant Molecular Biology*, 76(1–2),  
1291 69–83. doi:10.1007/s11103-011-9769-x
- 1292 Tomlinson, P. B. (1986). *The Botany of Mangroves*. New York: Cambridge University Press.
- 1293 Tyree, M. T., & Sperry, J. S. (1989). Vulnerability of Xylem to Cavitation and Embolism.  
1294 *Annual Review of Plant Physiology and Molecular Biology*, 19–38.  
1295 doi:10.1146/annurev.pp.40.060189.000315
- 1296 Uraji, M., Katagiri, T., Okuma, E., Ye, W., Hossain, M. A., Masuda, C., ... Murata, Y.  
1297 (2012). Cooperative Function of PLD and PLD 1 in Abscisic Acid-Induced Stomatal  
1298 Closure in *Arabidopsis*. *Plant Physiology*, 159(1), 450–460. doi:10.1104/pp.112.195578
- 1299 Van der Does, D., Boutrot, F., Engelsdorf, T., Rhodes, J., McKenna, J. F., Vernhettes, S., ...  
1300 Zipfel, C. (2017). The *Arabidopsis* leucine-rich repeat receptor kinase MIK2/LRR-KISS  
1301 connects cell wall integrity sensing, root growth and response to abiotic and biotic  
1302 stresses. *PLoS Genetics*, 13(6), 1–27. doi:10.1371/journal.pgen.1006832
- 1303 Vogt, J., Lin, Y., Pranchai, A., Froberg, P., Mehlig, U., & Berger, U. (2014). The importance  
1304 of conspecific facilitation during recruitment and regeneration: A case study in degraded  
1305 mangroves. *Basic and Applied Ecology*, 15(8), 651–660. doi:10.1016/j.baae.2014.09.005
- 1306 Walsh, B., & Blows, M. W. (2009). Abundant Genetic Variation + Strong Selection =  
1307 Multivariate Genetic Constraints: A Geometric View of Adaptation. *Annual Review of*  
1308 *Ecology, Evolution, and Systematics*, 40(1), 41–59.  
1309 doi:10.1146/annurev.ecolsys.110308.120242
- 1310 Walsh, P., Bursac, D., Law, Y. C., Cyr, D., & Lithgow, T. (2004). The J-protein family:  
1311 Modulating protein assembly, disassembly and translocation. *EMBO Reports*, 5(6), 567–  
1312 571. doi:10.1038/sj.embor.7400172
- 1313 Wang, P., Li, Z., Wei, J., Zhao, Z., Sun, D., & Cui, S. (2012). A Na<sup>+</sup>/Ca<sup>2+</sup> exchanger-like  
1314 protein (AtNCL) involved in salt stress in *Arabidopsis*. *Journal of Biological Chemistry*,  
1315 287(53), 44062–44070. doi:10.1074/jbc.M112.351643
- 1316 Wang, Q., Sullivan, R. W., Kight, A., Henry, R. L., Huang, J., Jones, A. M., & Korth, K. L.  
1317 (2004). Deletion of the Chloroplast-Localized Thylakoid Formation 1 Gene Product in  
1318 *Arabidopsis* Leads to Deficient Thylakoid Formation and Variegated Leaves. *Plant*  
1319 *Physiology*, 136(3), 3594–3604. doi:10.1104/pp.104.049841
- 1320 Wang, S., Chang, Y., & Ellis, B. (2016). Overview of OVATE FAMILY PROTEINS, A  
1321 Novel Class of Plant-Specific Growth Regulators. *Frontiers in Plant Science*, 7(March),  
1322 1–8. doi:10.3389/fpls.2016.00417
- 1323 Wang, S., Chang, Y., Guo, J., & Chen, J. G. (2007). *Arabidopsis* Ovate Family Protein 1 is a  
1324 transcriptional repressor that suppresses cell elongation. *Plant Journal*, 50(5), 858–872.  
1325 doi:10.1111/j.1365-313X.2007.03096.x
- 1326 Wehmeyer, N., Hernandez, L. D., Finkelstein, R. R., & Vierling, E. (1996). Synthesis of  
1327 Small Heat-Shock Proteins Is Part of the Developmental Program of Late Seed  
1328 Maturation. *Plant Physiology*, 112(2), 747–757. doi:10.1104/pp.112.2.747
- 1329 Wingler, A., Lea, P. J., Quick, W. P., & Leegood, R. C. (2000). Photorespiration: metabolic  
1330 pathways and their role in stress protection. *Philosophical Transactions of the Royal*  
1331 *Society B: Biological Sciences*, 355, 1517–1529. doi:10.1098/rstb.2000.0712
- 1332 Wolf, J. B. W., Lindell, J., & Backstrom, N. (2010). Speciation genetics: current status and  
1333 evolving approaches. *Philosophical Transactions of the Royal Society B: Biological*

- 1334 *Sciences*, 365(1547), 1717–1733. doi:10.1098/rstb.2010.0023
- 1335 Young, M. D., Wakefield, M. J., Smyth, G. K., & Oshlack, A. (2010). Gene ontology analysis  
1336 for RNA-seq: accounting for selection bias. *Genome Biology*, 11(2), R14.  
1337 doi:10.1186/gb-2010-11-2-r14
- 1338 Zhang, A., Ren, H.-M., Tan, Y.-Q., Qi, G.-N., Yao, F.-Y., Wu, G.-L., ... Wang, Y.-F. (2016).  
1339 S-Type Anion Channels SLAC1 and SLAH3 Function as Essential Negative Regulators  
1340 of Inward K<sup>+</sup> Channels and Stomatal Opening in Arabidopsis. *The Plant Cell*, 28(4),  
1341 949–965. doi:10.1105/tpc.15.01050
- 1342 Zhang, C., Zhang, L., Zhang, S., Zhu, S., Wu, P., Chen, Y., ... Wu, G. (2015). Global  
1343 analysis of gene expression profiles in physic nut (*Jatropha curcas* L.) seedlings exposed  
1344 to drought stress. *BMC Plant Biology*, 15(1), 1–14. doi:10.1186/s12870-014-0397-x
- 1345 Zhong, R., Lee, C., Zhou, J., McCarthy, R. L., & Ye, Z.-H. (2008). A Battery of Transcription  
1346 Factors Involved in the Regulation of Secondary Cell Wall Biosynthesis in *Arabidopsis*.  
1347 *The Plant Cell Online*, 20(10), 2763–2782. doi:10.1105/tpc.108.061325
- 1348
- 1349

1350

#### **Data accessibility**

- 1351 • Gene expression data and transcriptome sequences that support conclusions have been  
1352 deposited in GenBank with the accession code GSE123659;
- 1353 • SNP genotypes are available at Dryad doi:10.5061/dryad.h11t255 (M. V. Cruz et al.,  
1354 2019).

1355

#### **Author contributions**

- 1356 A.P.S., G.M.M. and M.V.C. designed the study. M.V.C. and G.M.M. conducted  
1357 fieldwork, prepared samples for sequencing and wrote the manuscript. M.V.C., G.M.M.,  
1358 R.S.O., M.D. and D.H.O. analyzed the RNA-Seq and nextRAD results. A.P.S, M.I.Z.,  
1359 G.M.M. contributed material/reagents/analytical tools. All authors discussed the results and  
1360 contributed to the manuscript.

1361 **Tables and Figures**

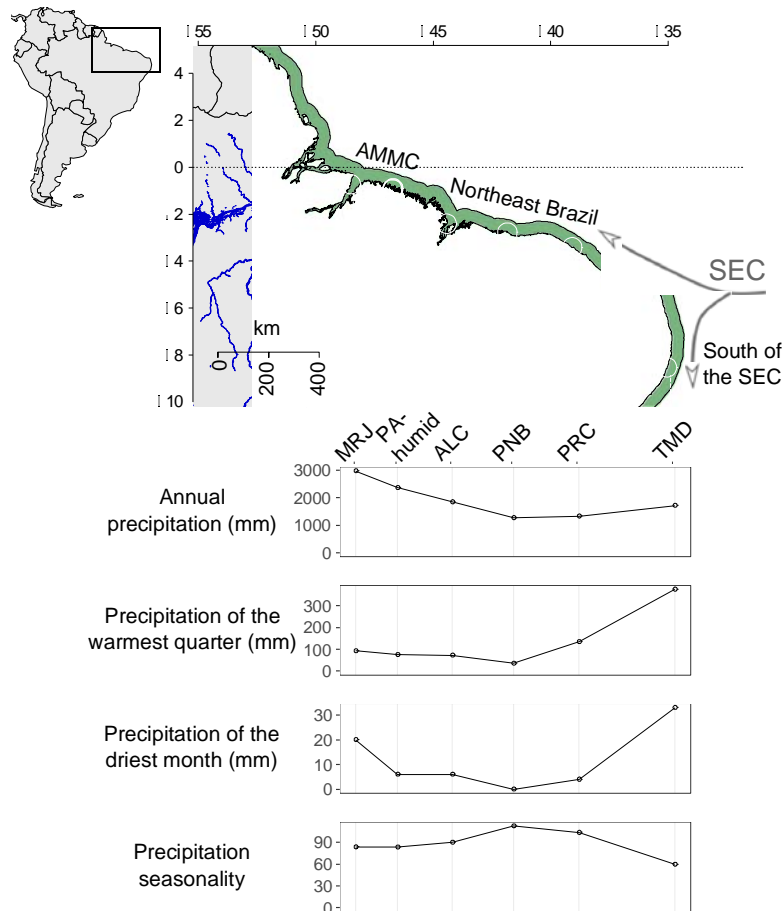

1362  
1363  
1364  
1365  
1366  
1367  
1368  
1369

**Figure 1. *Avicennia germinans* sampling sites along a low-latitude salinity and precipitation gradient.** Black points represent sampling sites, green area represents the occurrence of the species, and blue areas represent ponds and rivers. *Top*: Geographical location of the study area and sampling sites. *Bottom*: Environmental variation across the sampling sites (source: WorldClim). *AMMC*: Amazon Macrotidal Mangrove Coast. *SEC*: South Equatorial Current.

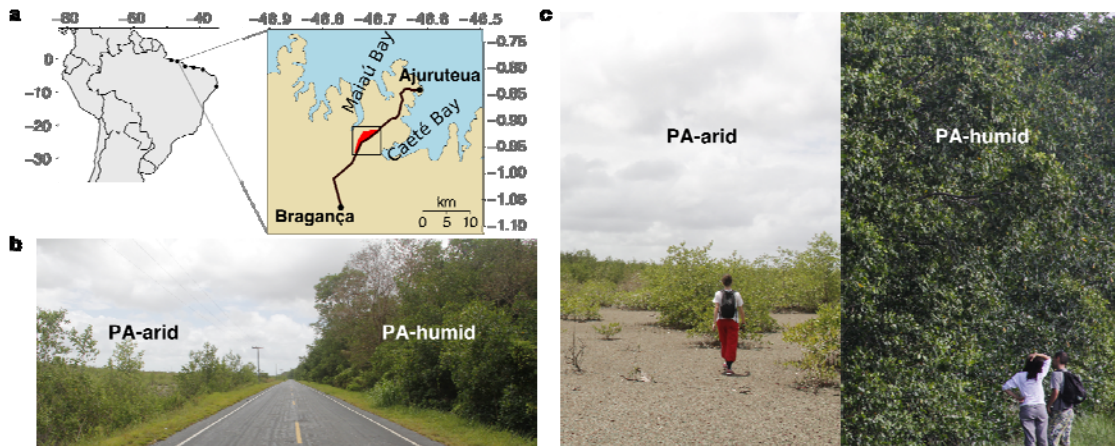

1370  
1371  
1372  
1373  
1374  
1375  
1376

**Figure 2. PA-arid and PA-humid sampling sites.** (a) Geographical location of sites, highlighted by a square (red colored area: PA-arid); (b) photograph of a section of the Bragança-Ajuruteua road (Pará, Brazil) along which severe changes in hydrology altered the mangrove community and tree morphology; (c) detailed photographs of the PA-arid and PA-humid sites. *Photographs authors: G.M. Mori and M.V. Cruz.*

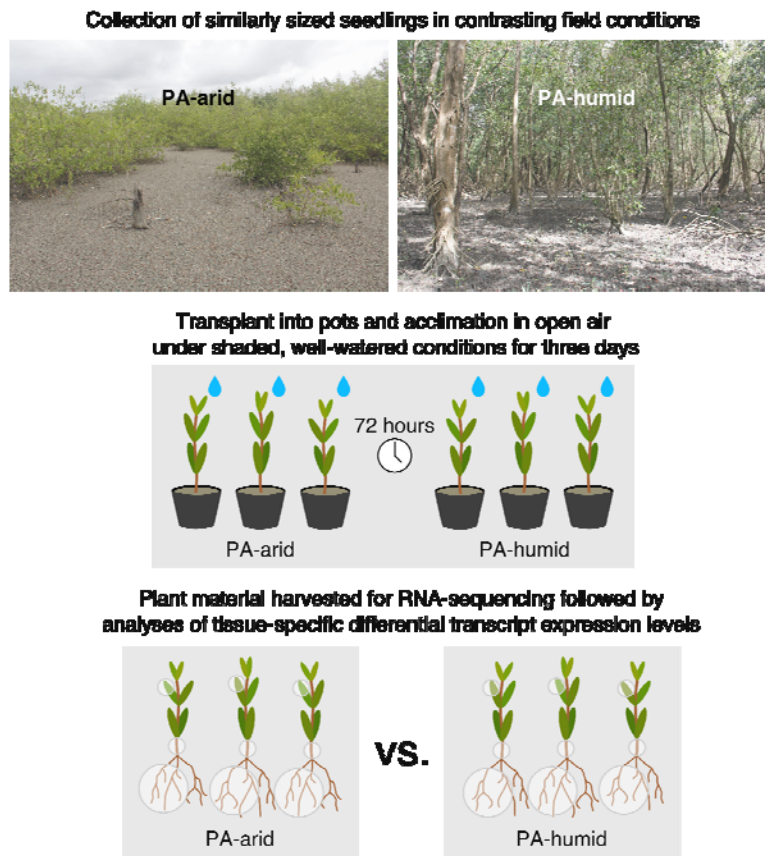

1377  
1378  
1379  
1380  
1381

**Figure 3. RNA sequencing experimental design.** Similarly sized *Avicennia germinans* seedlings naturally grown under adjacent, but contrasting field conditions were collected and transplanted into pots, where they acclimated for 72 hours under homogenous treatment. RNA was extracted from leaves, stems and roots for transcriptome sequencing. The

1382 transcriptome was *de novo* assembled and used as a reference for differential transcript  
1383 expression analyses.  
1384

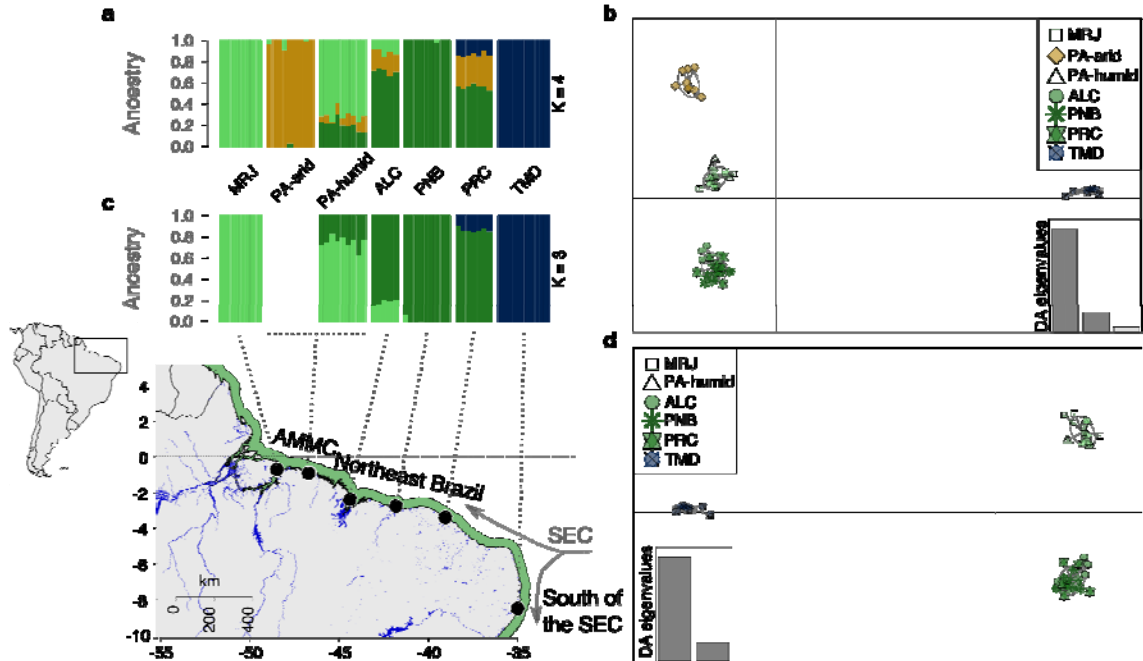

1385  
1386 **Figure 4. Genetic structure inferred from genome-wide single nucleotide polymorphism**  
1387 **(SNP) detected in *Avicennia germinans*.** (a) Attribution of ancestry implemented in the  
1388 program Admixture 1.3.0 for all sampled individuals; stacked bars represent individuals, and  
1389 each color represents one ancestral cluster (K=4). (b) Scatterplot of the first two principal  
1390 components of the multivariate discriminant analysis of principal components (DAPC) of  
1391 total genetic variance; all sampled individuals are represented as points; distinct symbols  
1392 indicate sampling sites. (c) Attribution of ancestry (using Admixture 1.3.0) for all sampled  
1393 individuals, excluding PA-arid samples; stacked bars represent individuals, and each color  
1394 represents one ancestral cluster (K=3). (d) Scatterplot of the first two principal components  
1395 of the DAPC of total genetic variance; sampled individuals, except for individuals sampled in  
1396 the PA-arid site, are represented as points; distinct symbols indicate sampling sites.

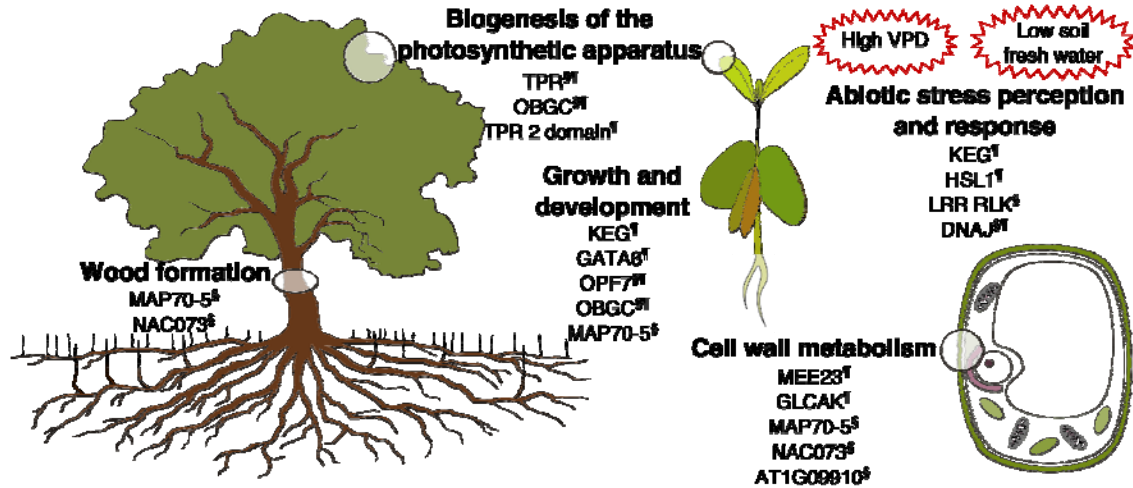

1397  
1398  
1399  
1400  
1401  
1402  
1403  
1404

**Figure 5. Schematic representation of key biological processes related to physiological drought-tolerance or response associated with candidate loci for selection in *Avicennia germinans* samples along tropical mangrove forests of the north-northeastern Brazilian coast.** Candidate loci were detected from two datasets: (1) all sampled individuals, using  $F_{ST}$  outlier tests (marked with §) and (2) a subset of individuals, without samples from the PA-arid site, combining genetic-environmental association tests and  $F_{ST}$  outlier approaches (marked with ¶).

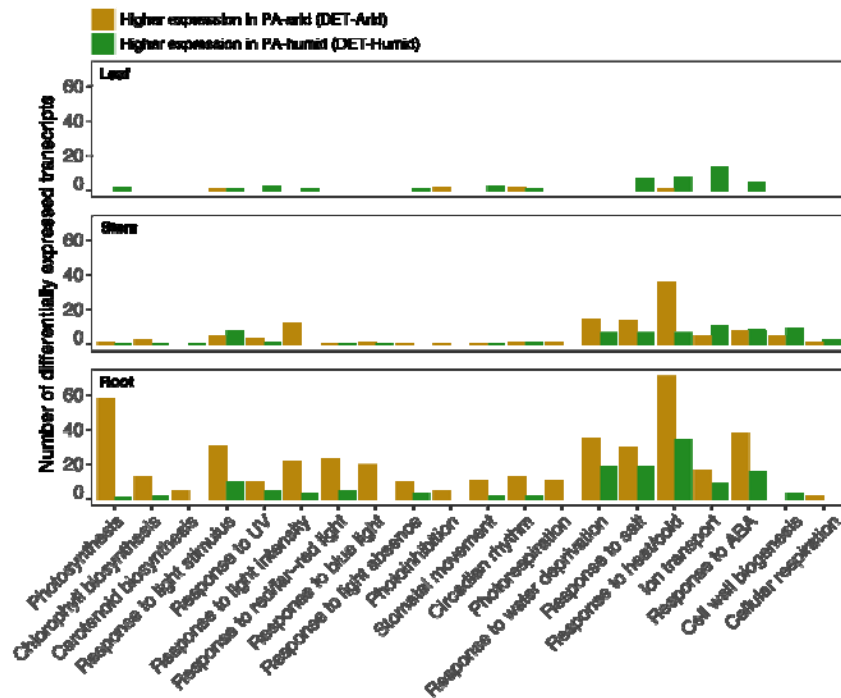

1405  
1406  
1407  
1408  
1409  
  
1410

**Figure 6. Functional categories of differentially expressed transcripts (DETs) identified between samples grown in the PA-arid and PA-humid sampling sites.** Categories were selected based on biological processes previously identified to be involved in the response, acclimation or resistance to water stress in model plants.



1411 **Table 1.** Characterization and geographic location of *Avicennia germinans* sampling sites.

| Sampling site ID | Climate classification† | Latitude; Longitude | Number of samples |         |
|------------------|-------------------------|---------------------|-------------------|---------|
|                  |                         |                     | nextRAD           | RNA-Seq |
| MRJ              | Am                      | 00.72 S; 48.49 W    | 8                 | -       |
| PA-arid‡         | Am                      | 00.90 S; 46.69 W    | 9                 | 3       |
| PA-humid         | Am                      | 00.94 S; 46.72 W    | 9                 | 3       |
| ALC              | Aw                      | 02.41 S; 44.41 W    | 5                 | -       |
| PNB              | Aw                      | 02.78 S; 41.82 W    | 9                 | -       |
| PRC              | Aw                      | 03.41 S; 39.06 W    | 7                 | -       |
| TMD              | As                      | 08.53 S; 35.01 W    | 10                | -       |

1412 †Köppen-Geiger climate classification system (Alvares, Stape, Sentelhas, Gonçalves, &  
 1413 Sparovek, 2013). *Am*: Tropical monsoon climate; *Aw*: Tropical wet savanna climate; *As*:  
 1414 Tropical dry savanna climate.

1415 ‡Samples from a forest flooded exclusively during spring tides (Lara & Cohen, 2006).

1416

1417 **Table 2.** Genetic diversity statistics, based on analyses of 2,297 genome-wide polymorphic  
 1418 loci detected in 57 individuals sampled in seven sampling sites along the equatorial Atlantic  
 1419 coastline of South America.  $\pi$ : Nucleotide diversity;  $H_E$ : expected heterozygosity;  $H_O$ :  
 1420 observed heterozygosity; pA: private alleles; %Poly: percentage of polymorphic loci;  $F_{IS}$ :  
 1421 inbreeding coefficient.

| Sampling site | $\pi$ (mean) | $\pi$ (s.e.) | $H_E$ | $H_O$ | pA | %Poly | $F_{IS}$ | Low Level (95% c.i.) | High Level (95% c.i.) |
|---------------|--------------|--------------|-------|-------|----|-------|----------|----------------------|-----------------------|
| MRJ           | 0.264        | 0.206        | 0.244 | 0.292 | 1  | 72.70 | -0.136   | -0.154               | -0.102                |
| PA-arid       | 0.317        | 0.189        | 0.295 | 0.326 | 1  | 83.76 | -0.050   | -0.067               | -0.022                |
| PA-humid      | 0.301        | 0.186        | 0.280 | 0.328 | 0  | 84.46 | -0.113   | -0.132               | -0.084                |
| ALC           | 0.282        | 0.214        | 0.249 | 0.269 | 0  | 69.83 | 0.030    | 0.009                | 0.070                 |
| PNB           | 0.208        | 0.210        | 0.195 | 0.234 | 0  | 58.21 | -0.154   | -0.180               | -0.111                |
| PRC           | 0.323        | 0.193        | 0.296 | 0.327 | 1  | 82.15 | -0.035   | -0.053               | -0.002                |
| TMD           | 0.123        | 0.192        | 0.130 | 0.168 | 46 | 34.52 | -0.426   | -0.452               | -0.376                |

1422

1423

1424 **Table 3. Annotation of candidate SNP loci putatively under selection, associated with**  
 1425 **tolerance of or response to physiological drought.** Candidate loci were detected from two  
 1426 datasets: (1) all sampled individuals, including PA-arid samples, using  $F_{ST}$  outlier approaches  
 1427 and (2) a subset of samples, excluding individuals from the PA-arid site, combining genetic-  
 1428 environmental association tests and  $F_{ST}$  outlier tests.

| Dataset | Transcript ID | Similar to†                                         | Environmental association (FDR)‡ | Putative function                                                                                                                                                                                        |
|---------|---------------|-----------------------------------------------------|----------------------------------|----------------------------------------------------------------------------------------------------------------------------------------------------------------------------------------------------------|
| 1       | Ag_23357      | AT4G28500, NAC073, NAC domain containing protein 73 | NA                               | Regulation of the biosynthesis of cellulose and hemicellulose in wood fibers and the expression of lignin-polymerizing and signaling genes (Hussey et al., 2011; Zhong, Lee, Zhou, McCarthy, & Ye, 2008) |

|         |          |                                                                                            |                                                 |                                                                                                                                                                                                                  |
|---------|----------|--------------------------------------------------------------------------------------------|-------------------------------------------------|------------------------------------------------------------------------------------------------------------------------------------------------------------------------------------------------------------------|
| 1       | Ag_47094 | AT4G17220, MAP70-5, microtubule-associated proteins 70-5                                   | NA                                              | Fundamental for the development of secondary cell wall band patterning in xylem tracheids and for wood formation, playing a role in the anisotropic expansion of cells (Pesquet, Korolev, Calder, & Lloyd, 2010) |
| 1       | Ag_26495 | AT5G67200, Leucine-rich repeat protein kinase (LRR-RLK) family protein                     | NA                                              | May play a role in hormones and abiotic stress sensing and signaling (ten Hove et al., 2011; Van der Does et al., 2017) and in regulating adaptation to salt stress (Lorenzo et al., 2009)                       |
| 1       | Ag_4919  | AT1G09910, Rhamnogalacturonate lyase family protein                                        | NA                                              | Associated with the degradation of the cell wall polysaccharides, and pectin (McDonough, Kadirvelraj, Harris, Poulsen, & Larsen, 2004)                                                                           |
| 1 and 2 | Ag_20543 | AT5G18950, Tetratricopeptide repeat (TPR)-like superfamily protein                         | PWQ (0.00018)                                   | Associated with photosynthetic machinery biogenesis, stabilization and repair (Bohne, Schwenkert, Grimm, & Nickelsen, 2016)                                                                                      |
| 1 and 2 | Ag_5627  | PREDICTED: GTP-binding protein OBGC, chloroplastic [Sesamum indicum]                       | PWQ (8.31e-05)                                  | Associated with the thylakoid membrane biogenesis and chloroplast protein synthesis and essential for early embryogenesis in response to light stimulus (Bang et al., 2009)                                      |
| 1 and 2 | Ag_29619 | AT2G18500, OFP7, ovate family protein 7                                                    | PWQ (0.00019)                                   | May be involved in various aspects of plant growth and participate in suppressing cell elongation (S. Wang, Chang, & Ellis, 2016; S. Wang, Chang, Guo, & Chen, 2007)                                             |
| 1 and 2 | Ag_38780 | AT2G24395, chaperone protein DNAJ-related                                                  | PWQ (8.31e-05)                                  | Regulation of the activity of Hsp70 chaperones (P. Walsh, Bursac, Law, Cyr, & Lithgow, 2004) and protein protection from stress-induced denaturation (Frydman, 2001)                                             |
| 2       | Ag_12760 | AT3G54810, GATA8, Plant-specific GATA-type zinc finger transcription factor family protein | PWQ (0.00363); PSEASON (0.00529); PDM (0.01916) | Associated with the control of plant growth and development (Manfield, Devlin, Jen, Westhead, & Gilmartin, 2006)                                                                                                 |
| 2       | Ag_135   | AT1G28440, HSL1, HAESA-like 1                                                              | PWQ (9.09e-05)                                  | The Ag_135 transcript has a kinase domain and is associated with growth and abiotic stress signaling (ten Hove et al., 2011)                                                                                     |
| 2       | Ag_15249 | AT2G34790, MEE23, FAD-binding Berberine family protein                                     | PWQ (8.31e-05)                                  | Involved in the lignification of the cell wall; mediates the oxidation of monolignols (Daniel et al., 2015) and is required for endosperm development (Pagnussat et al., 2005)                                   |
| 2       | Ag_10980 | AT5G13530, KEG, keep on going                                                              | PWQ (0.00041); PDM (0.02034)                    | Associated with the control of plant growth and development and critical for seedling regulation of abscisic acid perception and signaling (Stone, Williams, Farmer, Vierstra, & Callis, 2006)                   |

|   |          |                                           |                  |                                                                                                                                                                            |
|---|----------|-------------------------------------------|------------------|----------------------------------------------------------------------------------------------------------------------------------------------------------------------------|
| 2 | Ag_26982 | AT3G01640,<br>GLCAK,<br>glucuronokinase G | PWQ<br>(0.00011) | Involved in the biosynthesis of UDP-glucuronic acid, providing nucleotide sugars for the polymerization of cell wall compounds (Pieslinger, Hoepflinger, & Tenhaken, 2010) |
| 2 | Ag_11269 | AT2G25730,<br>unknown protein             | PWQ<br>(0,00016) | The Ag_11269 transcript has a TPR2 domain and, thus, may be involved in photosynthetic machinery biogenesis, stabilization and repair (Bohne et al., 2016)                 |

---

1429 †Blastx hit to *Arabidopsis thaliana* or *Sesamum indicum* [when indicated] gene models.  
1430 ‡(*FDR*): False discovery rate values (Benjamini-Hochberg procedure) for genetic-  
1431 environment association tests; *NA*: genetic-environment association tests were not available  
1432 for dataset (1) due to unavailability of environmental data for the PA-arid sites in public  
1433 databases; *PWQ*: Precipitation of the warmest quarter; *PSEASON*: Precipitation seasonality;  
1434 *PDM*: Precipitation of the driest month.  
1435
